# Supplementary material for: Serum metabolomics analysis and its clinical value in children with asthma
Source: Research Square preprint supplement (doi:10.21203/rs.3.rs-6979941/v1), 2025-11-13
Supplement: Supplementary file 1 [file 3ea07d33fcb9b980b7ef1f10.xlsx]

## Sheet: UPandDOWN
Table S1 663 differential metabolites identified between two groups
ID	m/z	Retention time (min)	Ion mode	Metabolites	Metabolites_cn	HMDB	METLIN	Lipidmaps	PubChem	Formula	VIP	log2FoldChange	FoldChange	Regulation	p-value
5.54_574.9902m/z	574.99	5.53698	pos	Perfluorooctane sulfonamidoacetic acid		HMDB0256327				C10H4F17NO4S	1.92023	1.41548	2.66748	Up	2.87118e-20
6.13_189.0787n	190.086	6.12522	pos	3-Indolepropionic acid	吲哚-3-丙酸	HMDB0002302	6602		3744	C11H11NO2	1.88172	-2.42902	0.185691	Down	0.00102673
11.14_293.1395m/z	293.139	11.1351	neg	Pseudoisoeugenol 2-methylbutanoate	拟异丁香酚2-甲基丁酸酯	HMDB0035503	90784		14056365	C15H20O3	1.67754	1.16741	2.24608	Up	3.75673e-15
7.93_317.0984m/z	317.098	7.93083	neg	L-trans-alpha-Amino-2-carboxycyclopropaneacetic acid	(2S,1'S,2'S)-2-(羧基环丙基)甘氨酸	HMDB0034442	89939		1271	C6H9NO4	1.57678	1.79861	3.47884	Up	0.000789878
0.77_115.0028m/z	115.003	0.768583	neg	Malic acid	苹果酸	HMDB0000156	45931		222656	C4H6O5	1.46524	1.15539	2.22744	Up	8.5689e-07
6.07_242.0434m/z	242.043	6.06748	neg	2-Amino-5-phosphonopentanoic acid	DL-2-氨基-5-膦酰基缬草酸	HMDB0247376	69668		1216	C5H12NO5P	1.42803	-1.52898	0.346522	Down	0.000824797
0.72_102.0551m/z	102.055	0.72045	neg	Gamma-Aminobutyric Acid	γ-氨基丁酸	HMDB0000112		LMFA01100039	119	C4H9NO2	1.42167	1.22235	2.33326	Up	3.33913e-05
4.50_133.0287m/z	133.029	4.49872	neg	3-Hydroxyphenylacetic acid	3-羟基苯乙酸	HMDB0000440	4150		12122	C8H8O3	1.34359	1.00885	2.01231	Up	8.45551e-07
7.95_183.1386m/z	183.139	7.94622	neg	(Z)-3-Hexenyl 3-methylbutanoate	异戊酸叶醇酯	HMDB0038278	93003	LMFA07010592	5367681	C11H20O2	1.24996	1.29319	2.4507	Up	0.00340663
6.85_397.2056m/z	397.206	6.8497	neg	2-(4-Hydroxy-3,5-di-tert-butylphenylthio)-hexanoic acid		HMDB0251106			40826	C20H32O3S	1.02152	-1.12311	0.459104	Down	0.0307095
12.84_336.2890m/z	336.289	12.8353	pos	R-Palmitoyl-(2-methyl) Ethanolamide			62966		18395309	C19H39NO2	4.09843	6.77345	109.399	Up	7.88235e-15
5.62_940.5109n	941.518	5.62035	pos	PGP(PGD2/i-19:0)	磷脂酰甘油磷酸(PGD2/i-19:0)	HMDB0275538				C45H82O16P2	3.82691	5.65792	50.4896	Up	2.85469e-19
8.40_224.1885n	225.196	8.39995	pos	1,3-Dicyclohexylurea	N,N-二环己脲	HMDB0244166	34503		4277	C13H24N2O	3.7948	-5.82657	0.0176209	Down	7.63951e-15
12.34_309.2418m/z	309.242	12.3446	pos	11-(3-methyl-5-propylfuran-2-yl)-undecanoic acid	11-(3-甲基-5-丙基呋喃-2-基)十一烷酸	HMDB0061646		LMFA01150018	71339239	C19H32O3	3.74223	5.9907	63.5888	Up	9.83556e-12
5.25_245.0124m/z	245.012	5.25148	neg	Ethylparaben sufate	对羟基苯甲酸乙酯硫酸酯	HMDB0240706			22908099	C9H10O6S	3.73064	6.75839	108.262	Up	1.94294e-08
5.62_905.4802m/z	905.48	5.62035	pos	Lyciumoside VI	枸杞苷 VI	HMDB0033500			131751439	C44H74O20	3.62795	5.23381	37.6299	Up	1.27713e-17
11.41_353.2123m/z	353.212	11.4104	neg	Levonorgestrel acetate		HMDB0254058			22006198	C23H30O3	3.41097	4.93722	30.6374	Up	4.55924e-12
10.32_306.2422m/z	306.242	10.3242	pos	Heterofibrin B1				LMFA01031205	46862737	C19H28O2	3.25547	4.52504	23.0236	Up	1.95918e-11
5.75_958.5768m/z	958.577	5.74863	pos	PGP(20:3-2OH/i-20:0)	磷脂酰甘油磷酸(20:3-2OH/i-20:0)	HMDB0275657				C46H86O15P2	3.24548	4.261	19.1729	Up	7.27112e-16
13.16_308.2942m/z	308.294	13.1628	pos	Presphaerol	前球蛋白醇		53664	LMPR0104220002	42608234	C20H34O	3.16887	4.55794	23.5546	Up	1.96704e-09
5.76_445.0778m/z	445.078	5.75938	neg	Baicalein 6-glucuronide	黄芩素6-葡萄糖苷酸			LMPK12111083	5321472	C21H18O11	3.13014	5.19315	36.5842	Up	1.01595e-06
4.14_202.0894m/z	202.089	4.13653	pos	(+/-)-3-[(2-methyl-3-furyl)thio]-2-butanone	3-[(2-甲基-3-呋喃)硫基]-2-丁酮	HMDB0032401	88425		12980878	C9H12O2S	3.12065	-3.97333	0.0636661	Down	8.25859e-16
5.82_681.3897m/z	681.39	5.82473	pos	Agelaxanthin B				LMPR01071020		C42H58O5	3.08199	3.84187	14.339	Up	2.92106e-16
6.42_387.1816m/z	387.182	6.42268	neg	3-Hydroxyphenyl-valeric acid	3-羟基苯基戊酸	HMDB0041666	96026		10559720	C11H14O3	3.06421	4.47618	22.2569	Up	3.04181e-08
15.11_312.3254m/z	312.325	15.1142	pos	2E-Phytenal	2E-植物醛	HMDB0035654	90919	LMPR0104010025	14035234	C20H38O	3.00366	4.12718	17.4745	Up	7.37683e-10
11.93_322.2735m/z	322.273	11.9311	pos	20:4(5Z,13Z,16Z,19Z)	脂肪酸(20:4)		74407	LMFA01030871	52921839	C20H32O2	2.99793	4.13997	17.6301	Up	3.62043e-09
2.99_207.1256n	208.133	2.99072	pos	1-(2,3-Dihydro-6,7-dimethyl-1H-pyrrolizin-5-yl)-2-hydroxy-1-propanone		HMDB0040010	94551		86127015	C12H17NO2	2.90546	-5.08027	0.0295587	Down	1.34564e-05
5.54_607.2378m/z	607.238	5.54235	neg	Lificiguat	利非西呱	HMDB0259948	64877		5712	C19H16N2O2	2.88981	-4.00284	0.062377	Down	1.09315e-08
6.66_582.2723m/z	582.272	6.6568	neg	Dihydrostreptomycin		HMDB0251330			3069	C21H41N7O12	2.88926	4.14649	17.71	Up	6.63334e-08
5.77_447.0917m/z	447.092	5.76558	pos	Baicalin	黄芩苷	HMDB0041832			13654833	C21H18O11	2.87617	4.5668	23.6998	Up	4.07943e-06
10.81_355.2279m/z	355.228	10.8081	neg	14-HDoHE	(4Z,7Z,10E,12E,16Z)-18-(3-乙基-1-环丙烯-1-基)-14-羟基-4,7,10,12,16-十八碳五烯酸	HMDB0060044			131769804	C23H32O3	2.7853	3.79129	13.845	Up	4.27623e-08
6.73_419.2078m/z	419.208	6.72662	neg	Macrophorin B	巨噬细胞素 B	HMDB0030456			131751020	C22H30O5	2.77251	4.31796	19.945	Up	1.25749e-05
13.93_312.3255m/z	312.325	13.9286	pos	N,N-dimethyl-Safingol			53956	LMSP01080056	42608375	C20H43NO2	2.77023	3.50765	11.3738	Up	1.83183e-09
5.76_467.0597m/z	467.06	5.75938	neg	5-[(2R)-3-(2-Carboxy-4-oxochromen-6-yl)oxy-2-hydroxypropoxy]-4-oxochromene-2-carboxylic acid	5-[(2R)-3-(2-羧基-4-氧代色烯-6-基)氧基-2-羟基丙氧基]-4-氧代色烯-2-羧酸	HMDB0257946			27686	C23H16O11	2.76478	4.21351	18.5521	Up	3.81661e-06
11.60_308.2579m/z	308.258	11.6003	pos	(Z)-Stellettic acid C	(Z)-芪酸 C			LMFA02000379	10469489	C19H30O2	2.75749	3.66665	12.6991	Up	4.97239e-08
5.03_929.4732m/z	929.473	5.0329	neg	As-PL(14:0/16:0)				LMGP14010006		C43H84AsO14P	2.75416	3.21787	9.30414	Up	1.02682e-13
7.11_363.0183m/z	363.018	7.10593	neg	Biochanin a 7-sulfate	生物鸡素a 7-硫酸盐	HMDB0240484				C16H12O8S	2.72586	4.13312	17.5466	Up	6.10749e-06
5.82_536.2991m/z	536.299	5.8169	pos	Corchorosol A	皮质醇A	HMDB0041137	95566		4254782	C29H44O9	2.71804	3.0514	8.29018	Up	1.35025e-14
11.87_587.0599m/z	587.06	11.8702	pos	Dotmp	1,4,7,10-四氮杂环十二烷-1,4,7,10-四(甲基膦酸)	HMDB0247657			124761	C12H32N4O12P4	2.69554	3.17249	9.01603	Up	2.40917e-11
5.15_898.5336n	921.523	5.14635	pos	PGP(i-20:0/18:1-O)	磷脂酰甘油磷酸(i-20:0/18:1-O)	HMDB0275672				C44H84O14P2	2.66566	3.11618	8.67089	Up	8.4319e-12
6.82_349.0389m/z	349.039	6.81518	neg	9-(Formyloxymethyl)-9H-fluorene-2-sulfonic acid		HMDB0258038			18680044	C15H12O5S	2.66074	3.67883	12.8067	Up	7.12973e-07
11.01_458.2380m/z	458.238	11.0087	neg	Panax ginseng Tetrapeptide		HMDB0302146			10253669	C18H33N7O7	2.63234	3.27971	9.71164	Up	1.51256e-08
5.54_675.2252m/z	675.225	5.54235	neg	Demethoxycurcumin	去甲氧基姜黄素	HMDB0033801	64196		5469424	C20H18O5	2.61877	-3.15065	0.112606	Down	7.36473e-10
14.32_326.3412m/z	326.341	14.3218	pos	9R,10S-Epoxy-6Z-heneicosene	9R,10S-环氧-6Z-二十碳烯		98305	LMFA12000315	11809018	C21H40O	2.61552	3.22064	9.32202	Up	7.49144e-09
5.54_539.2503m/z	539.25	5.54235	neg	Tetrahydroaldosterone-3-glucuronide	四氢醛固酮-3-葡萄糖醛酸	HMDB0010357	61672		167918	C27H40O11	2.60621	-3.31772	0.100292	Down	2.16684e-08
11.91_1002.6468m/z	1002.65	11.9116	pos	Galalpha1-6Glcbeta-Cer(t19:1/21:0(2OH[R])				LMSP05000013		C51H97NO15	2.60136	3.0433	8.24377	Up	3.861e-11
6.37_549.1255m/z	549.125	6.36728	neg	5,3',4'-Trihydroxy-7-methoxy-4-phenylcoumarin 5-O-(6''-acetyl)-galactoside	5,3',4'-三羟基-7-甲氧基-4-苯基香豆素 5-O-(6''-乙酰基)-半乳糖苷			LMPK12100043	44559794	C24H24O12	2.59981	3.58561	12.0054	Up	1.47028e-06
5.14_943.5334m/z	943.533	5.13737	neg	Cortistatin A		HMDB0250469			73007612	C30H36N2O3	2.59151	2.95109	7.73336	Up	3.72585e-12
8.50_556.3316m/z	556.332	8.49592	neg	Leu-Arg-Asn-Arg	亮氨酰-精氨酰-天冬酰胺酰-精氨酸	HMDB0304803	181313		22702886	C22H43N11O6	2.59049	3.66998	12.7284	Up	2.0539e-06
5.15_982.5546n	1005.54	5.14635	pos	PGP(i-22:0/PGE2)	磷脂酰甘油磷酸(i-22:0/PGE2)	HMDB0275846				C48H88O16P2	2.58435	2.73078	6.63815	Up	4.32423e-15
6.23_535.0346m/z	535.035	6.22963	pos	UDP-alpha-D-xylose		HMDB0304529				C14H20N2O16P2-2	2.57957	-3.61312	0.0817228	Down	1.08557e-06
5.62_464.1911m/z	464.191	5.62035	pos	Phe-Leu-Phe	苯丙氨酰-亮氨酰-苯丙氨酸		20450		25167894	C24H31N3O4	2.57704	-3.47527	0.0899162	Down	3.36682e-06
11.20_283.1704m/z	283.17	11.1997	neg	Methyltrienolone	甲基三烯醇酮	HMDB0254669			5125276	C19H24O2	2.57467	3.28205	9.72738	Up	7.72251e-08
5.71_637.3637m/z	637.364	5.70755	pos	3'-N-Acetyl-4'-O-(9-octadecenoyl)fusarochromanone		HMDB0038567	93238		102146306	C35H54N2O6	2.5662	2.60841	6.09831	Up	9.01818e-17
6.37_551.1391m/z	551.139	6.37365	pos	Limocitrin 7-(6''-acetylglucoside)	柠檬柠檬酸 7-(6''-乙酰基葡萄糖苷)		51627	LMPK12113215	44260014	C25H26O14	2.55848	3.48825	11.2219	Up	1.67134e-06
12.43_339.2329m/z	339.233	12.4307	neg	1,1'-[1,11-Undecanediylbis(oxy)]bisbenzene	1,1'-[1,11-十一烷二基双（氧）]双苯	HMDB0039762	94313		71343858	C23H32O2	2.54961	3.12299	8.71189	Up	2.61087e-08
7.82_583.2678m/z	583.268	7.82148	neg	TMC-1C				LMFA08020205	10030158	C30H38N2O7	2.5318	3.36647	10.3136	Up	8.28949e-07
7.87_544.2673m/z	544.267	7.8652	pos	FR901463				LMFA08020176	70678766	C27H42ClNO8	2.52939	3.42133	10.7133	Up	1.49259e-06
4.17_553.0387m/z	553.039	4.17438	neg	Ceftriaxone	头孢曲松	HMDB0015343			5479530	C18H18N8O7S3	2.52771	3.71868	13.1654	Up	4.12315e-05
6.13_514.2846m/z	514.285	6.13497	neg	Taurohyocholate	牛磺草胆酸盐	HMDB0011637			131750644	C26H45NO7S	2.52472	3.50316	11.3385	Up	2.09993e-06
5.25_329.9902m/z	329.99	5.25148	neg	AS-604850	5-[(2,2-二氟-1,3-苯并二恶茂-5-基)亚甲基]噻唑烷-2,4-二酮		45220		5287855	C11H5F2NO4S	2.51438	3.33099	10.063	Up	6.48404e-07
11.41_355.2188m/z	355.219	11.4104	neg	1,2,2-Trimethylpropyl dimethylphosphinate		HMDB0244104			119152	C8H19O2P	2.49958	2.98192	7.9004	Up	1.96826e-08
7.80_702.2521m/z	702.252	7.79785	neg	Tetrahydrofolyl-[Glu](n)		HMDB0006826			45479706	C29H37N9O12	2.49895	3.30843	9.90687	Up	9.1228e-07
6.20_405.1921m/z	405.192	6.1978	neg	Cortisone	可的松	HMDB0002802	271	LMST02030090	222786	C21H28O5	2.49342	-3.19109	0.109493	Down	3.98498e-07
6.63_462.2865m/z	462.286	6.62907	neg	Latanoprost ethyl amide			45716		10287826	C25H39NO4	2.47627	3.00684	8.03804	Up	1.47516e-08
5.75_639.3866m/z	639.387	5.74863	pos	PON-PG				LMGP20060013	134812466	C31H59O11P	2.469	2.35828	5.1276	Up	1.36575e-19
5.39_609.2533m/z	609.253	5.3911	neg	14-chlorotetracosane-1,15-disulfate			96752	LMFA00000023	56935796	C24H49ClO8S2	2.46839	-3.24139	0.105742	Down	1.63357e-06
5.71_480.2788m/z	480.279	5.70755	pos	Neryl rhamnosyl-glucoside	橙花鼠李糖苷	HMDB0029349	86210		131750856	C22H38O10	2.45655	2.5006	5.65919	Up	1.81923e-14
7.13_413.1363m/z	413.136	7.13492	pos	Fragransol A		HMDB0033537	89347		14015411	C21H26O6	2.45609	-3.53056	0.0865356	Down	1.18618e-05
6.14_363.2160m/z	363.216	6.14445	pos	Hydrocortisone	皮质醇	HMDB0000063	272	LMST02030001	5754	C21H30O5	2.44447	-2.88955	0.134945	Down	2.83244e-08
6.61_411.2391m/z	411.239	6.61092	neg	Beta-Cortolone	β-Cortolone	HMDB0013221			52923742	C21H34O5	2.43879	-3.10862	0.115934	Down	6.42192e-07
4.99_885.4475m/z	885.447	4.985	neg	Schidigerasaponin E1		HMDB0036297			73798945	C44H70O18	2.43622	2.64245	6.24389	Up	3.70386e-11
12.28_336.2891m/z	336.289	12.2847	pos	Margaroyl-EA			3717	LMFA08040049	14455158	C19H39NO2	2.42106	2.98768	7.93199	Up	5.34404e-07
5.75_656.3804n	674.414	5.74863	pos	Fibraurecdyside A	纤维脲苷A			LMST01010430	44445723	C34H56O12	2.41747	2.26907	4.82011	Up	8.11266e-19
7.87_499.2964n	522.286	7.8652	pos	Taurochenodeoxycholic acid	牛磺鹅去氧胆酸	HMDB0000951	57991	LMST05040005	387316	C26H45NO6S	2.40877	3.29743	9.83162	Up	4.61886e-06
3.02_122.0964m/z	122.096	3.02333	pos	Phenylethylamine	苯乙胺	HMDB0012275	62906		1001	C8H11N	2.40528	-2.29634	0.203578	Down	7.58892e-18
4.77_427.0616n	428.069	4.77232	pos	Cefpodoxime	头孢泊肟	HMDB0015486	1615		6335986	C15H17N5O6S2	2.39888	3.81153	14.0406	Up	0.00072131
5.67_914.5516m/z	914.552	5.67072	pos	PGP(18:2+=O/i-20:0)	磷脂酰甘油磷酸(18:2+=O/i-20:0)	HMDB0275665				C44H82O14P2	2.39738	2.2314	4.69588	Up	6.58955e-19
5.15_1027.5550m/z	1027.56	5.15103	neg	PIP(20:0/PGF1alpha)	磷脂酰肌醇(20:0/PGF1alpha)	HMDB0279548				C49H92O19P2	2.39548	2.49715	5.6457	Up	3.42222e-12
4.77_957.5127m/z	957.513	4.77217	neg	PGP(18:0/20:3-2OH)	磷脂酰甘油磷酸(18:0/20:3-2OH)	HMDB0272542				C44H82O15P2	2.39044	2.61508	6.12657	Up	1.65279e-10
13.95_298.3099m/z	298.31	13.9491	pos	9Z-Nonadecenal			46531	LMFA06000246	44256591	C19H36O	2.38487	2.72385	6.60634	Up	1.50401e-08
6.20_422.1823m/z	422.182	6.1978	neg	Neopetasitenine	新蜂斗菜烯碱	HMDB0030329			6440206	C21H29NO8	2.38364	-3.01521	0.123689	Down	1.59459e-06
6.67_515.2909n	538.28	6.67225	pos	Taurocholic acid	牛磺胆酸	HMDB0000036	34542	LMST05040001	6675	C26H45NO7S	2.38063	3.2992	9.84368	Up	9.99536e-06
7.40_522.2611m/z	522.261	7.39693	neg	Pegaptanib		HMDB0256200			76374506	C22H44N3O10P	2.37652	3.18333	9.08404	Up	2.89165e-06
8.81_860.6199m/z	860.62	8.80562	neg	PC(22:1/20:5)	磷脂酰胆碱(22:1/20:5)		76308	LMGP01012028	52923533	C50H88NO8P	2.37512	3.01312	8.07308	Up	1.02644e-06
3.92_414.0533m/z	414.053	3.92152	pos	Desacetylcefotaxime	3-去乙酰基头孢噻肟	HMDB0041868	605		9576239	C14H15N5O6S2	2.37229	3.52781	11.5339	Up	0.000348735
7.11_454.1629m/z	454.163	7.1116	pos	5,2',4',5'-Tetrahydroxy-3-(3-hydroxy-3-methylbutyl)-6'',6''-dimethylpyrano[2'',3'':7,8]flavone	5,2',4',5'-四羟基-3-(3-羟基-3-甲基丁基)-6'',6''-二甲基吡喃[2'',3'':7,8]黄酮	HMDB0033666	49352	LMPK12110924	14630497	C25H26O8	2.36785	-3.21865	0.107421	Down	7.39253e-06
5.71_626.3633m/z	626.363	5.70755	pos	Am-LPE(18:0/0:0)				LMGP21050001		C29H58NO12P	2.36652	2.13311	4.38663	Up	3.49919e-21
5.27_484.9322m/z	484.932	5.26865	pos	Perfluorooctanesulfonyl fluoride	全氟辛基磺酰氟	HMDB0246129	72061		9388	C8F18O2S	2.36181	2.49462	5.63578	Up	3.10063e-10
2.10_445.1200m/z	445.12	2.10377	neg	2-Aminoanthraquinone	2-氨基蒽醌		70066		8341	C14H9NO2	2.35505	2.53387	5.79125	Up	2.22493e-10
5.48_534.9537n	552.988	5.47545	pos	8-oxo-GTP		HMDB0304250				C10H12N5O15P3-4	2.34727	2.12898	4.37408	Up	8.23242e-20
5.37_505.0992m/z	505.099	5.3662	neg	Quercetin 3-(6''-acetylglucoside)	槲皮素3-(6''-乙酰葡萄糖苷)		50554		44259187	C23H22O13	2.34717	3.15083	8.88165	Up	1.23762e-05
5.75_491.2852m/z	491.285	5.74863	pos	glas#20	1-o-(11r-(3,6-二脱氧-α-l-阿拉伯-吡喃己糖基氧基)-十二酰基)-β-d-吡喃葡萄糖			LMFA13040101	86289879	C24H44O11	2.34646	2.38024	5.20623	Up	1.65546e-12
9.38_286.1433m/z	286.143	9.37765	pos	Piperine	胡椒碱	HMDB0029377	43568		638024	C17H19NO3	2.34018	-3.33947	0.0987912	Down	0.000137035
7.09_435.1461m/z	435.146	7.09233	neg	Chidamide	西达本胺		64835		9800555	C22H19FN4O2	2.3373	-3.48691	0.0891942	Down	9.83239e-05
6.75_434.1822m/z	434.182	6.75468	neg	2-(3-(2-Aminoethyl)-1h-indol-5-yloxy)acetyl-l-tyrosyl-glycinamide		HMDB0244551			17930350	C23H27N5O5	2.32547	3.22018	9.319	Up	4.16055e-05
12.07_356.2353n	355.228	12.0656	neg	Estradiol 3-Valerate		HMDB0251959			14653377	C23H32O3	2.32479	2.58124	5.98455	Up	2.75457e-08
7.82_634.2649m/z	634.265	7.82148	neg	CAY10633			64757		53394034	C34H39NO8	2.32467	2.976	7.86803	Up	2.14476e-06
6.65_373.2005m/z	373.2	6.64738	pos	Penicildione C	青霉二酮C			LMST02030240		C22H28O5	2.30278	3.11386	8.65695	Up	3.17352e-05
7.40_736.2524m/z	736.252	7.39693	neg	Alpha-Tetrasaccharide	血型A型四糖VI型	HMDB0000445	5434		21252248	C26H45NO20	2.29686	2.93588	7.65225	Up	2.54014e-06
6.58_498.2898m/z	498.29	6.58242	neg	Tauroursodeoxycholic acid	牛磺熊去氧胆酸	HMDB0000874	5835		12443252	C26H45NO6S	2.29344	2.85234	7.22173	Up	1.06141e-06
8.82_720.2574m/z	720.257	8.82477	neg	Lewis b		HMDB0254067				C26H45NO19	2.28824	2.85678	7.24399	Up	1.11543e-06
7.09_452.1364m/z	452.136	7.09233	neg	gamma-L-Glutamyl-gamma-L-glutamyl-L-methionine	γ-L-谷氨酰-γ-L-谷氨酰-L-蛋氨酸	HMDB0038674	93329		131752419	C15H25N3O8S	2.28706	-3.2464	0.105375	Down	5.27743e-05
8.85_560.2844m/z	560.284	8.84532	neg	Candoxatril	坎沙曲	HMDB0014754				C29H41NO7	2.28666	2.78251	6.8805	Up	8.4083e-07
6.31_481.1882m/z	481.188	6.31047	neg	Austin		HMDB0034463	89951		430632	C27H32O9	2.28444	-3.04177	0.121432	Down	1.23413e-05
5.58_582.3384m/z	582.338	5.57812	pos	PHOOA-PA				LMGP20070005	134812494	C27H49O10P	2.27783	2.01465	4.04083	Up	8.87052e-19
3.58_166.1225m/z	166.122	3.58178	pos	Ephedrine	麻黄碱	HMDB0015451	2541		9294	C10H15NO	2.27636	3.2132	9.27403	Up	0.00010456
4.87_621.1102m/z	621.11	4.87387	neg	Apigenin 7-glucuronosyl-(1->2)-glucuronide	海常黄甙	HMDB0301685	409557	LMPK12110359	5488004	C27H26O17	2.27453	3.14266	8.83149	Up	5.52689e-05
4.86_1045.5654m/z	1045.57	4.85843	neg	PGP(TXB2/i-22:0)	磷脂酰甘油磷酸(TXB2/i-22:0)	HMDB0275861				C48H90O17P2	2.2687	2.295	4.90755	Up	2.54733e-11
5.03_939.5018m/z	939.502	5.0329	neg	PGP(20:3-OH/18:1)	磷脂酰甘油磷酸(20:3-OH/18:1)	HMDB0272806				C44H80O14P2	2.26134	2.06912	4.1963	Up	1.03832e-15
7.40_510.2797m/z	510.28	7.39622	pos	Landiolol		HMDB0253969			9914270	C25H39N3O8	2.26062	2.96908	7.83035	Up	7.36815e-06
4.82_1001.5392m/z	1001.54	4.82223	neg	PGP(PGF1alpha/20:1)	磷脂酰甘油磷酸(PGF1alpha/20:1)	HMDB0273324				C46H86O16P2	2.25877	2.42734	5.379	Up	1.68003e-09
8.82_601.2728m/z	601.273	8.82477	neg	Tetrapeptide		HMDB0258927				C27H40N8O9	2.25334	2.8479	7.19952	Up	2.15776e-06
5.79_661.3906m/z	661.391	5.79138	pos	Phenylalanyl-leucyl-leucyl-arginyl-asparagine		HMDB0244598			74765219	C31H51N9O7	2.24931	1.90993	3.7579	Up	8.59532e-22
7.87_464.2824m/z	464.282	7.8652	pos	Fluocortin butyl		HMDB0252350			21872759	C26H35FO5	2.24438	3.05373	8.30355	Up	1.93256e-05
5.09_854.5074n	872.541	5.08512	pos	PGP(18:0/18:2)	磷脂酰甘油磷酸(18:0/18:2)	HMDB0013507			53481825	C42H80O13P2	2.24159	2.0919	4.2631	Up	1.5631e-14
7.45_511.3029m/z	511.303	7.45293	neg	LysoPA(i-20:0/0:0)	溶血磷脂酸(i-20:0/0:0)	HMDB0114767			17786813	C23H47O7P	2.24089	2.97089	7.84019	Up	6.78708e-06
6.14_475.1956m/z	475.196	6.14497	neg	Balapiravir		HMDB0248852			17975723	C21H30N6O8	2.24044	-2.74064	0.149619	Down	3.54428e-06
6.46_389.1974m/z	389.197	6.45897	neg	Cascarillin	美鼠李皮素	HMDB0036836			5088211	C22H32O7	2.23042	2.83482	7.13455	Up	1.32785e-05
4.68_665.3165m/z	665.316	4.67545	neg	Tebufenpyrad	吡螨胺	HMDB0258765	68867		86354	C18H24ClN3O	2.22662	2.39664	5.26576	Up	2.45904e-09
11.81_879.5742m/z	879.574	11.8073	pos	PS(18:0/PGD1)	磷脂酰丝氨酸(18:0/PGD1)	HMDB0281412				C44H80NO13P	2.22299	2.71901	6.5842	Up	7.92881e-07
5.10_983.5287m/z	983.529	5.095	neg	PGP(20:1/20:3-2OH)	磷脂酰甘油磷酸(20:1/20:3-2OH)	HMDB0273269				C46H84O15P2	2.22137	2.06638	4.18833	Up	3.66436e-14
8.81_882.6020m/z	882.602	8.80562	neg	PC(22:4/22:5)	磷脂酰胆碱(22:4/22:5)	HMDB0008648	60094		53479261	C52H86NO8P	2.21914	2.85509	7.23549	Up	7.83026e-06
5.09_938.5283n	961.518	5.08512	pos	PGP(20:4-2OH(5S,12R)/i-20:0)	磷脂酰甘油磷酸(20:4-2OH(5S,12R)/i-20:0)	HMDB0275651				C46H84O15P2	2.21444	2.00661	4.01836	Up	2.59253e-15
6.14_397.1788m/z	397.179	6.14497	neg	(R)-3-((2-(2-(4-Methylpiperidin-1-yl)ethyl)pyrrolidin-1-yl)sulfonyl)phenol		HMDB0245575			4184551	C18H28N2O3S	2.21371	-2.79803	0.143783	Down	1.03599e-05
5.62_892.5384m/z	892.538	5.62035	pos	Pesticide4_Ivermectin_C48H74O14_22,23-dihydroavermectin B1		HMDB0247302			4330618	C48H74O14	2.21194	1.93131	3.81401	Up	2.07491e-17
7.16_411.1849m/z	411.185	7.15857	neg	Cuelure	乙酸覆盆子酮酯	HMDB0033594	89397		19137	C12H14O3	2.2079	-2.62911	0.161644	Down	9.35885e-07
5.02_855.4812m/z	855.481	5.01943	neg	Lotrafiban		HMDB0254173			9823909	C23H32N4O4	2.20683	2.20692	4.61688	Up	1.19441e-10
8.04_367.1587m/z	367.159	8.04068	neg	3,5-Di-O-methyl-8-prenylafzelechin-4beta-ol	3,5-二-O-甲基-8-异戊二烯基-4β-醇		47432	LMPK12020216	44257167	C22H26O6	2.20683	-2.82137	0.141476	Down	9.95122e-06
7.40_617.2675m/z	617.267	7.39693	neg	Koenigine		HMDB0030207	86798		5318825	C19H19NO3	2.20291	2.80715	6.99902	Up	5.786e-06
5.48_291.0268m/z	291.027	5.47545	pos	Mono-(3-carboxypropyl) phthalate	单(3-羧基丙基)邻苯二甲酸酯-D4	HMDB0061748	329023		53435015	C12H12O6	2.20246	-2.97462	0.127218	Down	3.79259e-05
5.58_852.4916n	870.525	5.57812	pos	PGP(18:3/18:0)	磷脂酰甘油磷酸(18:3/18:0)	HMDB0013564			53481882	C42H78O13P2	2.20023	1.85876	3.62695	Up	2.22145e-20
11.52_872.5403m/z	872.54	11.5171	pos	PS(19:0/22:6)	磷脂酰丝氨酸(19:0/22:6)		78143	LMGP03010479	52925589	C47H80NO10P	2.19992	2.41926	5.34896	Up	5.49547e-08
3.62_148.1120m/z	148.112	3.62482	pos	2-(5-Methyl-2-furanyl)piperidine	2-(5-甲基呋喃-2-基)哌啶	HMDB0039836	94384		17389585	C10H15NO	2.19944	2.93261	7.63492	Up	7.25815e-05
7.40_549.2799m/z	549.28	7.39693	neg	Isoleucyl-prolyl-arginine-4-nitroanilide		HMDB0250210			13629222	C23H36N8O5	2.19898	2.8386	7.15326	Up	1.09031e-05
6.45_389.1953m/z	389.195	6.45092	pos	Adamantylamide-alanyl-isoglutamine		HMDB0247998			13669364	C18H30N4O3	2.19688	2.80217	6.97489	Up	2.60934e-05
14.65_449.2889m/z	449.289	14.6497	pos	Ethyl-(5S,12S)-diacetoxy-(6E,8E,10E,14Z)-eicosatetraenoate				LMFA03000017	134812177	C26H40O6	2.19145	-2.52176	0.174131	Down	6.35669e-07
7.53_465.1931m/z	465.193	7.52998	neg	Isoflupredone acetate		HMDB0253640			499988	C23H29FO6	2.19099	-2.91784	0.132325	Down	5.08786e-05
5.29_749.4149n	732.412	5.29025	pos	OHDdiA-PS				LMGP20040036	134812417	C36H64NO13P	2.19022	1.8666	3.64672	Up	2.10968e-19
11.41_155.0466m/z	155.047	11.4149	pos	Diethyl phosphate	磷酸二乙酯	HMDB0012209			654	C4H11O4P	2.17831	2.15395	4.45045	Up	1.09407e-10
4.96_811.4553m/z	811.455	4.96417	neg	Adenosine, 8-(butylamino)-N-cyclopentyl-		HMDB0258096			44282877	C19H30N6O4	2.17553	2.14595	4.42582	Up	3.14031e-11
5.35_771.4280n	754.425	5.35133	pos	beta-D-Glucosyloxydestruxin B	β-D-葡萄糖氧基德鲁辛 B	HMDB0040136	94676		131752783	C36H61N5O13	2.16484	1.86818	3.65073	Up	2.57482e-17
7.09_367.1586m/z	367.159	7.09233	neg	Dehydroepiandrosterone sulfate	硫酸脱氢表雄酮	HMDB0001032	34483	LMST05020010	12594	C19H28O5S	2.1645	-2.91801	0.13231	Down	5.58609e-05
8.85_533.2669n	578.265	8.84532	neg	Pralsetinib	BLU-667（拉西替尼）	HMDB0304855				C27H32FN9O2	2.16148	2.80008	6.96481	Up	1.45174e-05
13.39_563.3226m/z	563.323	13.392	neg	Perulactone	秘鲁内酯	HMDB0034392	89899		433638	C30H46O7	2.15413	-2.63396	0.161101	Down	6.50417e-06
6.19_329.1759m/z	329.176	6.18785	neg	4,4'-Propane-2,2-diylbis(2,6-dimethylphenol)	四甲基双酚A		319718		79717	C19H24O2	2.15327	-2.35763	0.195112	Down	3.36902e-07
6.04_375.2160m/z	375.216	6.044	pos	Penicildione B	青霉二酮B			LMST02030239		C22H30O5	2.15303	2.63381	6.20665	Up	1.29191e-05
6.30_549.1758m/z	549.176	6.30417	neg	Metronidazole benzoate	苯酰甲硝唑	HMDB0254688	418225		83213	C13H13N3O4	2.15233	-2.78966	0.14462	Down	1.46189e-05
7.40_590.2485m/z	590.249	7.39693	neg	Mycobactins		HMDB0254968			3083702	C27H37N5O10	2.15105	2.69983	6.49725	Up	9.06673e-06
4.92_841.4214m/z	841.421	4.92375	neg	Sufotidine	舒福替丁	HMDB0258563				C20H31N5O3S	2.14981	2.11632	4.33585	Up	7.60298e-11
5.85_259.0008m/z	259.001	5.84825	pos	Buntansin A	丁苯甲素A	HMDB0035086	90433		15627934	C11H8O5	2.14574	-2.55821	0.169786	Down	2.40757e-06
10.14_312.1586m/z	312.159	10.1397	pos	Piperettine		HMDB0034371	89882		10244953	C19H21NO3	2.14358	-2.87078	0.136713	Down	0.000174939
8.56_179.0708m/z	179.071	8.56182	neg	(4-Methylphenyl)acetaldehyde	4-甲基苯乙醛	HMDB0029639	86393		61006	C9H10O	2.13745	-2.51952	0.1744	Down	1.49906e-05
4.71_644.3392n	625.321	4.71162	neg	Goshonoside F3	枸杞皂甙F3	HMDB0038376	93084		131752349	C32H52O13	2.1373	2.26633	4.81097	Up	1.86366e-08
7.68_437.1618m/z	437.162	7.67802	neg	3-Hydroxymethyl-picumast	7-[3-[4-[（4-氯苯基）甲基]哌嗪-1-基]丙氧基]-3-（羟基甲基基）-4-甲基苯并吡喃-2-酮	HMDB0245901			128095	C25H29ClN2O4	2.12998	-3.0058	0.124498	Down	0.000383228
3.40_277.1255m/z	277.125	3.398	pos	Pimonidazole	哌莫硝唑	HMDB0256554	44852		50981	C11H18N4O3	2.12713	2.10591	4.30469	Up	2.31441e-10
3.02_246.0885m/z	246.089	3.02333	pos	Synephrine acetonide		HMDB0039939	94481		204759	C12H17NO2	2.12107	-2.71887	0.151893	Down	1.24827e-05
5.58_873.5049m/z	873.505	5.57812	pos	Dirithromycin	地红霉素	HMDB0015089			70789200	C42H78N2O14	2.11827	1.74886	3.36092	Up	4.21799e-19
9.18_505.2764m/z	505.276	9.1761	pos	VD 2656			42567	LMST03020641	24779636	C30H42O3S	2.11713	-2.52495	0.173746	Down	2.18712e-05
4.51_577.2637m/z	577.264	4.50858	neg	Calotropin			3590	LMST01120046	16142	C29H40O9	2.1161	2.09205	4.26354	Up	1.17404e-10
6.27_369.1743m/z	369.174	6.26513	neg	Androstenediol 3-sulfate		HMDB0248416				C19H30O5S	2.11272	-3.08045	0.11822	Down	0.000394218
6.63_464.2992m/z	464.299	6.62985	pos	Solacetal B				LMFA02000382		C26H38O6	2.10812	2.39502	5.25983	Up	1.11002e-06
8.82_919.6034m/z	919.603	8.82477	neg	PG(22:6-2OH(10S,17)/i-24:0)	磷脂酰甘油(22:6-2OH(10S,17)/i-24:0)	HMDB0272276				C52H91O12P	2.10686	2.90376	7.48376	Up	0.000193672
9.06_507.2238m/z	507.224	9.063	neg	6-dehydrotestosterone 17-glucosiduronic acid	6-脱氢睾酮 17-葡萄糖苷酸	HMDB0010337	57942	LMST05010024	5460852	C25H34O8	2.10619	-2.99713	0.125249	Down	0.000435152
8.85_652.2700m/z	652.27	8.84532	neg	Glucosaminylmuramyl-2-alanine-D-isoglutamine		HMDB0259500				C25H43N5O15	2.09928	2.48589	5.60178	Up	3.14913e-06
9.39_679.3139m/z	679.314	9.38942	neg	Propiomazine	丙酰马嗪	HMDB0014915	44141		4940	C20H24N2OS	2.09033	2.50457	5.67481	Up	7.73542e-06
8.82_533.2851m/z	533.285	8.82477	neg	Diethofencarb	乙霉威		68820		91742	C14H21NO4	2.08819	2.43048	5.39074	Up	1.98117e-06
4.99_895.4763m/z	895.476	4.985	neg	PGP(PGE1/i-17:0)	磷脂酰甘油磷酸(PGE1/i-17:0)	HMDB0275397				C43H80O16P2	2.08191	1.81572	3.52036	Up	8.68034e-14
3.88_317.1493m/z	317.149	3.878	pos	Isoleucyl-Tyrosine	异亮氨酰-酪氨酸	HMDB0028919			342468	C15H22N2O4	2.07785	-2.05264	0.241043	Down	1.18593e-08
8.85_588.2249m/z	588.225	8.84532	neg	Carboxymethyl chitosan		HMDB0249663			118797615	C20H37N3O14	2.07725	2.59303	6.03363	Up	1.2616e-05
9.89_541.2186m/z	541.219	9.88687	neg	EI-1625-2				LMFA08020174	10743861	C27H32N2O7	2.07624	2.50361	5.67102	Up	1.64831e-05
5.63_462.1773m/z	462.177	5.63425	neg	Dihydroisomorphine-6-glucuronide		HMDB0061137			131770045	C23H29NO9	2.07212	-2.66282	0.15791	Down	0.000209429
9.85_497.2314m/z	497.231	9.84508	neg	PA(20:4-OH(19S)/2:0)	磷脂酸(20:4-OH(19S)/2:0)	HMDB0266494				C25H41O9P	2.0704	2.32191	4.99995	Up	2.85609e-06
14.47_193.0129m/z	193.013	14.4654	pos	Trimesic acid	均苯三甲酸	HMDB0259234	268545		11138	C9H6O6	2.06983	-2.34098	0.197377	Down	1.33002e-06
5.79_593.2584m/z	593.258	5.78713	neg	3-O(beta-D-glucopyranosyl)-3beta,5beta,14beta,16beta-tetrahydroxy-19-oxo-bufa-20,22-dienolide	3-O(β-D-吡喃葡萄糖基)-3β,5β,14β,16β-四羟基-19-氧代-bufa-20,22-二烯内酯			LMST01130043		C30H42O12	2.06838	-2.5308	0.173043	Down	4.94693e-05
8.85_737.2471m/z	737.247	8.84532	neg	6-methylthiohexyldesulfoglucosinolate		HMDB0304232				C14H27NO6S2	2.0667	2.49896	5.65279	Up	9.0012e-06
7.11_425.1174m/z	425.117	7.10593	neg	Luprostiol	7-(2-{[3-(3-氯苯氧基)-2-羟丙基]硫烷基}-3,5-二羟基环戊基)庚-5-烯酸	HMDB0254218			43678	C21H29ClO6S	2.06581	-2.71556	0.152242	Down	8.13043e-05
4.77_272.1850m/z	272.185	4.77232	pos	(2E)-Hept-2-enoylcarnitine	(2E)-庚-2-烯酰肉碱	HMDB0241684				C14H25NO4	2.06315	-2.19709	0.218076	Down	1.24707e-06
6.91_532.2896m/z	532.29	6.91133	neg	ibho#24				LMFA13040145	86289901	C29H43NO8	2.05868	2.61047	6.10704	Up	1.88096e-05
5.48_808.4658n	826.5	5.47545	pos	PA(22:6-OH/22:6)	磷脂酸(22:6-OH/22:6)	HMDB0266256				C47H69O9P	2.05338	1.6324	3.10028	Up	1.45562e-19
7.82_566.2774m/z	566.277	7.82148	neg	Batrachotoxinin A 20-alpha-benzoate	蝙蝠毒素 A 20-α-苯甲酸酯	HMDB0248883			73715310	C31H39NO6	2.04412	2.16772	4.49314	Up	2.83738e-07
4.90_757.4002m/z	757.4	4.90275	neg	Bioside		HMDB0302324			3084119	C38H62O15	2.04311	1.99984	3.99955	Up	1.63289e-09
7.20_451.0708m/z	451.071	7.2007	neg	(Z)-Resveratrol 3-(4''-sulfoglucoside)		HMDB0037076	92052		131752141	C20H22O11S	2.04	-2.7599	0.147634	Down	0.000148981
9.19_271.2414m/z	271.241	9.1905	pos	Ethylestrenol	乙基雌酚	HMDB0252076			3302	C20H32O	2.03929	-2.34127	0.197336	Down	2.54505e-05
5.03_810.4814n	828.515	5.02715	pos	PA(22:5/22:6-OH)	磷脂酸(22:5/22:6-OH)	HMDB0266041				C47H71O9P	2.03598	1.75523	3.3758	Up	1.38859e-13
4.84_713.3742m/z	713.374	4.84182	neg	DL-Laudanosine	劳丹素	HMDB0030213	1154		15548	C21H27NO4	2.02828	2.03275	4.09184	Up	1.29175e-08
3.77_180.1381m/z	180.138	3.76753	pos	Methylephedrine	利巴韦林-13C5溶液,100PPM	HMDB0041932			4374	C11H17NO	2.02486	2.4956	5.63962	Up	7.86382e-05
4.87_409.1784m/z	409.178	4.86963	pos	17-phenyl trinor-13,14-dihydro Prostaglandin A2			45409		15413267	C23H30O4	2.02419	1.82283	3.53775	Up	1.52836e-11
8.85_451.3163m/z	451.316	8.84532	neg	(9E)-10-Nitrooctadec-9-enoylcarnitine	(9E)-10-硝基十八-9-烯酰肉碱	HMDB0241823				C25H46N2O6	2.02203	2.37642	5.19246	Up	9.2347e-06
4.71_832.4927m/z	832.493	4.71247	pos	PC(16:1/20:5-OH)	磷脂酰胆碱(16:1/20:5-OH)	HMDB0286061				C44H76NO9P	2.0211	-2.01787	0.246922	Down	7.86249e-08
5.05_894.5021n	917.491	5.04522	pos	PGP(20:3-O/18:0)	磷脂酰甘油磷酸(20:3-O/18:0)	HMDB0272503				C44H80O14P2	2.01632	1.67528	3.19382	Up	5.30168e-15
11.91_980.6334m/z	980.633	11.9116	pos	PC(PGF2alpha/24:1)	磷脂酰胆碱(PGF2alpha/24:1)	HMDB0288729				C52H96NO11P	2.01429	2.08235	4.23496	Up	4.19045e-08
4.87_512.2811m/z	512.281	4.86963	pos	Flumethasone Pivalate	特戊酸氟米松	HMDB0014801	4030		443980	C27H36F2O6	2.00665	1.68688	3.21959	Up	1.76812e-14
0.72_76.0761m/z	76.0761	0.719367	pos	Trimethylamine N-oxide	三甲胺N-氧化物	HMDB0000925	3773		1145	C3H9NO	2.00012	-2.08065	0.236407	Down	1.97353e-06
5.43_546.3084m/z	546.308	5.43212	pos	Americine		HMDB0034441			5855402	C31H39N5O4	1.9993	1.54364	2.9153	Up	9.82339e-20
5.71_632.0398m/z	632.04	5.70755	pos	Cyanidin 3-(6''-dioxalylglucoside)				LMPK12010225	44256830	C25H21O17+	1.99845	1.49501	2.81866	Up	1.06896e-22
14.30_312.3255m/z	312.326	14.3013	pos	9R,10S-Epoxy-6Z-eicosene	9R,10S-环氧-6Z-二十碳烯		98297	LMFA12000307	15708134	C20H38O	1.99792	2.00253	4.00702	Up	3.49797e-07
15.02_346.1651m/z	346.165	15.0231	pos	5-O-Methylleridol	5-O-甲基环烯醚萜醇		52689	LMPK12140200	42607881	C19H20O5	1.99581	2.44009	5.42676	Up	2.11847e-05
7.08_520.1241m/z	520.124	7.07877	neg	Pelargonidin 3-(6''-acetylglucoside)				LMPK12010029	23584711	C23H23O11+	1.99221	-2.4931	0.177625	Down	6.65469e-05
6.31_491.3007m/z	491.301	6.31497	pos	Solacetal D				LMFA02000384		C28H44O8	1.99053	1.78958	3.45715	Up	1.20093e-10
6.42_455.1691m/z	455.169	6.42268	neg	PF-3845			45514		25154867	C24H23F3N4O2	1.98966	2.39993	5.27777	Up	6.24619e-05
12.06_820.5077m/z	820.508	12.0573	pos	PS(15:0/22:4)	磷脂酰丝氨酸(15:0/22:4)	HMDB0112336	77823	LMGP03010159	52925269	C43H76NO10P	1.98562	1.96958	3.91654	Up	1.08345e-08
3.94_295.1397m/z	295.14	3.9395	neg	D-Digitoxose		HMDB0251279			325714	C6H12O4	1.98408	1.65771	3.15516	Up	7.91685e-14
12.04_864.5336m/z	864.534	12.0377	pos	PI-Cer(t18:0/18:0)				LMSP03030013	70699086	C42H84NO12P	1.97812	2.32607	5.01437	Up	3.9732e-06
9.38_308.1251m/z	308.125	9.37765	pos	Deoxyaminopteroic acid	脱氧氨基苯甲酸	HMDB0244853	448452		72441	C15H15N7O2	1.97456	-2.63098	0.161434	Down	0.000910131
4.19_433.1458m/z	433.146	4.19493	neg	Captopril	卡托普利	HMDB0015328			44093	C9H15NO3S	1.97032	2.20624	4.61471	Up	3.03466e-06
5.68_302.1019m/z	302.102	5.68017	pos	Terizidone	特立齐酮	HMDB0258834			65720	C14H14N4O4	1.97011	-1.89603	0.268682	Down	3.64683e-08
12.04_906.5841m/z	906.584	12.0377	pos	PS(20:4-OH/22:0)	磷脂酰丝氨酸(20:4-OH/22:0)	HMDB0282882				C48H86NO11P	1.96856	2.32089	4.99641	Up	5.24213e-06
4.99_425.0188m/z	425.019	4.985	neg	Spinacetin 3-O-sulfate	3-O-硫酸旋覆花素		51444	LMPK12113032	44259878	C17H14O11S	1.96607	2.27708	4.84695	Up	1.93888e-05
7.35_369.1744m/z	369.174	7.35418	neg	5alpha-Dihydrotestosterone sulfate	5α-硫酸二氢睾酮	HMDB0006278	57975	LMST05020023	18665256	C19H30O5S	1.96425	-2.64038	0.160386	Down	0.000710483
9.46_391.2856m/z	391.286	9.462	neg	3alpha,15beta-Dihydroxy-5beta-cholan-24-oic Acid	3α,15β-二羟基-5β-胆烷-24-油酸		84364	LMST04010048	5283837	C24H40O4	1.96365	-2.3347	0.198238	Down	0.000105318
6.00_421.2235m/z	421.224	5.99832	neg	Macrophorin C	巨噬细胞蛋白 C	HMDB0030455			131751019	C22H32O5	1.95691	2.56837	5.93137	Up	0.000347427
5.09_498.2659n	481.263	5.08512	pos	Petromylidene C				LMST04010453		C26H42O7S	1.95375	1.55586	2.9401	Up	2.0114e-15
4.81_387.1654m/z	387.165	4.8118	pos	Methylsyringin	甲基丁香苷	HMDB0039570			131752679	C18H26O9	1.94834	1.63907	3.11465	Up	5.89115e-13
7.77_393.1954m/z	393.195	7.77428	neg	Mofegiline		HMDB0254829			114903	C11H13F2N	1.94339	1.94449	3.84901	Up	1.35502e-07
7.20_505.0428m/z	505.043	7.2007	neg	Cefditoren	头孢托仑	HMDB0015199			9870843	C19H18N6O5S3	1.94317	-2.70058	0.153831	Down	0.000567399
5.54_573.3383m/z	573.338	5.53698	pos	DG(8:0/0:0/20:5-3OH)	甘油二酯(8:0/0:0/20:5-3OH)	HMDB0297205				C31H50O8	1.9336	1.42374	2.6828	Up	4.55707e-21
7.29_511.2915m/z	511.291	7.29037	neg	(S)-Nerolidol 3-O-[a-L-rhamnopyranosyl-(1->2)-b-D-glucopyranoside]	(S)-橙花叔醇 3-O-[αL-吡喃鼠李糖基-(1->2)-bD-吡喃葡萄糖苷]	HMDB0040844	95302		14060449	C27H46O10	1.93245	-2.29476	0.203802	Down	9.24664e-05
4.22_224.0291m/z	224.029	4.21905	pos	Cysteinyl-Cysteine	胱氨酰半胱氨酸	HMDB0028772			15607039	C6H12N2O3S2	1.93221	-2.16845	0.22245	Down	1.02176e-05
9.34_465.3222m/z	465.322	9.33548	neg	TetraHCA	3,7,12,24-四羟基胆甾烷-26-油酸	HMDB0062534			13991770	C27H46O6	1.93149	2.02822	4.07902	Up	2.43e-06
7.53_533.1805m/z	533.181	7.52998	neg	3-[(2-Benzyl-3-sulfanylpropanoyl)amino]propanoic acid		HMDB0258443				C13H17NO3S	1.92957	-2.46824	0.180712	Down	0.000203486
10.35_207.1022m/z	207.102	10.3488	neg	2-Methyl-4-phenylbutyraldehyde	Α-甲基苯丁醛	HMDB0032415	88439		62911	C11H14O	1.92554	1.74837	3.3598	Up	7.75145e-09
10.24_223.1325m/z	223.132	10.2422	pos	Isoamyl p-anisate	对茴香酸异戊酯	HMDB0038894	93513		119709	C13H18O3	1.92091	-2.0374	0.243602	Down	1.06338e-06
7.68_505.1496m/z	505.15	7.67802	neg	OSU03012	2-氨基-N-[4-[5-(2-菲基)-3-(三氟甲基)-1H-吡唑-1-基]苯基]乙酰胺		96406		10027278	C26H19F3N4O	1.91971	-2.60155	0.164762	Down	0.000828562
5.50_308.1850m/z	308.185	5.49597	pos	6-Octenoylcarnitine	6-辛烯酰肉碱	HMDB0241700				C15H27NO4	1.91962	-2.30999	0.201662	Down	0.000116367
5.79_525.2708m/z	525.271	5.78713	neg	Iganidipine	伊加地平	HMDB0253387				C28H38N4O6	1.91876	-2.35098	0.196013	Down	0.000208638
4.93_431.1915m/z	431.191	4.9276	pos	beta-Phenylethanol beta-D-rutinoside		HMDB0303058				C20H30O10	1.91805	1.62513	3.08469	Up	6.12932e-12
4.29_383.1926m/z	383.193	4.28538	neg	(5S,6R)-Methyl 5,6,7-trihydroxyheptanoate		HMDB0247393			12898083	C8H16O5	1.91796	1.574	2.9773	Up	4.09646e-13
5.50_563.9882m/z	563.988	5.49597	pos	Formamidopyrimidine nucleoside triphosphate	甲酰胺嘧啶核苷三磷酸	HMDB0006822	63909		440840	C10H18N5O15P3	1.9149	1.39328	2.62676	Up	4.24964e-21
4.75_709.3427m/z	709.343	4.75125	neg	Strophanthin	旋花草甙	HMDB0242744			220861	C36H54O14	1.91235	1.68198	3.20867	Up	8.30589e-11
5.54_216.1592m/z	216.159	5.53698	pos	Ethyl butylacetylaminopropionate	驱蚊酯	HMDB0246904	72595		104150	C11H21NO3	1.90967	-1.86229	0.275039	Down	3.61935e-08
4.92_288.1276m/z	288.128	4.92375	neg	Tebuconazole	戊唑醇	HMDB0258762	72295		86102	C16H22ClN3O	1.908	1.68345	3.21195	Up	7.68271e-11
4.75_365.1525m/z	365.152	4.75195	pos	Acitretin	阿维A酸	HMDB0014602	564		5284513	C21H26O3	1.90595	1.63013	3.0954	Up	2.03039e-11
7.40_465.3092n	464.302	7.39693	neg	N-Choloylglycine	甘氨胆酸钠盐	HMDB0255104	88551		755	C26H43NO6	1.90582	2.08429	4.24067	Up	5.99244e-06
4.52_562.3197n	580.353	4.5241	pos	Apomine	化合物APOMINE	HMDB0248525			176405	C28H52O7P2	1.9042	1.58664	3.00349	Up	1.36058e-12
6.14_407.2077m/z	407.208	6.14497	neg	1alpha-Hydroxycorticosterone	1α-羟基皮质酮	HMDB0244860			21850823	C21H30O5	1.89962	-2.04079	0.243031	Down	9.02005e-06
10.20_449.2549m/z	449.255	10.2037	neg	Lovastatin	洛伐他汀	HMDB0014372	1036		53232	C24H36O5	1.89355	-2.3017	0.202823	Down	0.0001463
4.28_429.1704m/z	429.17	4.28183	pos	N-(4-((5-(3-(2-Aminoethyl)-1H-indol-5-yl)-1,2,4-oxadiazol-3-yl)methyl)phenyl)methanesulfonamide		HMDB0260308	423630		132059	C20H21N5O3S	1.89163	1.50557	2.83937	Up	3.11844e-13
11.26_470.3405n	469.333	11.2624	neg	23-Hydroxy-3-oxocycloart-24-en-26-oic acid	23-羟基-3-氧代环芳基-24-en-26-油酸	HMDB0034568	90032		131751583	C30H46O4	1.89152	2.42679	5.37694	Up	0.000447299
8.05_177.0552m/z	177.055	8.04875	neg	Marasin	马拉辛			LMFA05000705	15560105	C9H8O	1.88872	-1.94118	0.260404	Down	9.27429e-06
10.18_392.1329m/z	392.133	10.1806	neg	N6-Carbamoyl-L-threonyladenosine		HMDB0041623			92021849	C15H21N7O7	1.88149	1.77881	3.43143	Up	1.18863e-08
5.29_743.4027m/z	743.403	5.29025	pos	PA(22:6/15:1)	磷脂酸(22:6/15:1)		81987	LMGP10010821	52929414	C40H65O8P	1.88052	1.36605	2.57765	Up	7.70658e-20
4.97_766.4554n	784.489	4.96838	pos	PA(22:6/20:5)	磷脂酸(22:6/20:5)	HMDB0115418	82005	LMGP10010839	52929432	C45H67O8P	1.88001	1.4932	2.81512	Up	1.20561e-13
4.14_195.0874m/z	195.087	4.13653	pos	Caffeine	咖啡因	HMDB0001847	1455		2519	C8H10N4O2	1.88001	-2.50812	0.175785	Down	0.00242807
5.48_313.0365m/z	313.037	5.48167	neg	Crombenin	克龙贝宁		52492	LMPK12130077	42607794	C16H12O8	1.87848	-2.54083	0.171844	Down	0.00074633
9.18_549.2685m/z	549.269	9.17853	neg	[(1S,2S,4S,5S)-2-(6-Aminopurin-9-yl)-5-(hydroxymethyl)-4-bicyclo[3.1.0]hexanyl]methanol		HMDB0260215				C13H17N5O2	1.8765	-2.06116	0.239622	Down	7.71405e-05
5.62_603.0235m/z	603.024	5.62035	pos	Uridine diphosphate glucuronic acid	尿苷二磷酸葡萄糖醛酸	HMDB0000935	5884		17473	C15H22N2O18P2	1.87463	1.33096	2.51571	Up	2.26205e-21
7.06_611.6926m/z	611.693	7.05533	pos	Hexasodium metaphosphate (P6O186(-))		HMDB0303419				Na6O18P6	1.87078	2.01997	4.05576	Up	1.01182e-06
5.15_461.2652m/z	461.265	5.14635	pos	19-(3-methyl-butanoyloxy)-villanovane-13alpha,17-diol			53639	LMPR0104150003	42608223	C25H42O5	1.86671	1.49512	2.81888	Up	6.54004e-13
6.03_788.4613m/z	788.461	6.02833	pos	PGP(i-14:0/a-17:0)	磷脂酰甘油磷酸(i-14:0/a-17:0)	HMDB0116568			131823223	C37H74O13P2	1.86309	1.69564	3.2392	Up	5.57083e-09
10.60_395.1529m/z	395.153	10.5998	neg	1-(2H-1,3-Benzodioxol-5-yl)-2-[2,6-dimethoxy-4-(prop-2-en-1-yl)phenoxy]propyl acetate	1-(2H-1,3-苯并二氧杂环戊烯-5-基)-2-[2,6-二甲氧基-4-(丙-2-烯-1-基)苯氧基]丙酯乙酸酯	HMDB0030827	87217		131751084	C23H26O7	1.85702	1.72055	3.29561	Up	3.41159e-08
9.65_379.2108m/z	379.211	9.6545	neg	PGE2 1,15-lactone	前列腺素E2 1,15-内酯		45953	LMFA03010198	11067624	C20H30O4	1.85614	1.81622	3.52158	Up	1.93317e-07
6.14_331.1916m/z	331.192	6.14497	neg	Andrographolide	穿心莲内酯	HMDB0248395			343585	C20H30O5	1.8558	-1.92089	0.264092	Down	6.16775e-06
8.85_504.2398m/z	504.24	8.84852	pos	Glucosylgalactosyl hydroxylysine	化合物 T31940	HMDB0000585	5567		122304	C18H34N2O13	1.85426	2.01584	4.04416	Up	1.55083e-05
5.39_531.2988m/z	531.299	5.39218	pos	Microdiscusol G	微盘素G			LMST05020059		C27H48O9S	1.85283	1.32742	2.50954	Up	1.56425e-19
0.71_193.1544m/z	193.154	0.711317	pos	L-argininium(1+)	L-精氨酸(1+)	HMDB0062762			1549073	C6H15N4O2+	1.85082	-1.76385	0.29446	Down	8.7285e-07
6.73_436.1980m/z	436.198	6.72662	neg	3-((4-(2-Methoxyphenyl)piperazin-1-yl)methyl)-2,3-dihydroimidazo(1,2-c)quinazolin-5(6H)-one		HMDB0250890			132891	C22H25N5O2	1.84975	2.31932	4.99099	Up	0.000659173
6.00_376.2245n	377.232	6.00267	pos	ent-16-epi-13-E4c-NeuroP				LMFA04010332	131840652	C22H32O5	1.84765	2.35304	5.109	Up	0.000488395
5.03_404.2318m/z	404.232	5.02715	pos	N-Myristoyl Histidine	N-肉豆蔻酰组氨酸	HMDB0242052			13995467	C20H35N3O3	1.84667	1.57616	2.98175	Up	2.73022e-10
5.25_698.4004n	716.434	5.249	pos	PI(12:0/12:0)	磷脂酰肌醇(12:0/12:0)			LMGP06010962	52928414	C33H63O13P	1.83077	1.29865	2.45998	Up	1.60362e-19
1.89_161.9861m/z	161.986	1.89362	neg	Acesulfame	安赛蜜	HMDB0033585	319828		36573	C4H5NO4S	1.82485	-2.80023	0.143564	Down	0.00603786
4.50_421.2041m/z	421.204	4.50352	pos	Sibrafiban		HMDB0258287			12007083	C20H28N4O6	1.81988	1.4218	2.6792	Up	5.54212e-13
5.83_298.0004m/z	298	5.83245	neg	4-Amino-5-hydroxymethyl-2-methylpyrimidine diphosphate		HMDB0301920			22290169	C6H13N3O8P2	1.81726	-2.10505	0.232444	Down	9.12595e-05
7.63_465.2496m/z	465.25	7.63152	neg	Dimethyl 3-methoxy-4-oxo-5-(8,11,14-pentadecatrienyl)-2-hexenedioate		HMDB0032099	88183		131751255	C24H36O6	1.8163	-2.0638	0.239185	Down	8.00459e-05
4.43_277.1005m/z	277.101	4.42607	pos	Benzo[ghi]perylene	苯并(G,H,I)苝	HMDB0249010	69963		9117	C22H12	1.81446	1.56475	2.95826	Up	2.75433e-09
5.17_654.3743n	672.408	5.16692	pos	PA-PG				LMGP20060014	134812467	C31H59O12P	1.81235	1.28061	2.42941	Up	5.59114e-19
4.99_850.4761n	873.465	4.98623	pos	PGP(16:1/20:3)	磷脂酰甘油磷酸(16:1/20:3)	HMDB0013496			53481815	C42H76O13P2	1.80935	1.36275	2.57175	Up	1.71294e-14
4.73_446.2419m/z	446.242	4.73275	pos	Trp-Gln-Leu	色氨酰-谷氨酰胺酰-亮氨酸		21112		11976253	C22H31N5O5	1.80827	1.5108	2.84969	Up	1.6008e-10
13.02_849.5651m/z	849.565	13.0202	pos	PG(20:5/22:2)	磷脂酰甘油(20:5/22:2)		79500	LMGP04010675	52926940	C48H81O10P	1.80799	1.81964	3.52992	Up	1.65625e-06
4.87_807.4242m/z	807.424	4.87387	neg	PGP(18:2+=O/a-15:0)	磷脂酰甘油磷酸(18:2+=O/a-15:0)	HMDB0274420				C39H72O14P2	1.80787	1.52438	2.87663	Up	7.46171e-10
4.63_435.2026m/z	435.203	4.63452	neg	Rogletimide	罗谷亚胺	HMDB0257289			56487	C12H14N2O2	1.80755	2.17402	4.5128	Up	0.000321767
3.68_253.1276m/z	253.128	3.67958	pos	2,3-Butanediol glucoside	2,3-丁二醇葡萄糖苷	HMDB0040822	95284		78171387	C10H20O7	1.80648	1.63967	3.11594	Up	3.02816e-08
4.10_483.9524m/z	483.952	4.09863	neg	Difluorodeoxycytidine triphosphate		HMDB0251267				C9H14F2N3O13P3	1.80484	-2.02584	0.245561	Down	0.000205397
4.32_238.2011m/z	238.201	4.32313	pos	Tetra-ethoxypropane		HMDB0258865			22024899	C11H24O4	1.80035	-1.29285	0.408144	Down	7.4376e-17
7.65_393.2649m/z	393.265	7.64887	neg	Noravicholic acid	去甲维胆酸			LMST04060029	118701774	C23H38O5	1.79642	1.87129	3.6586	Up	3.27099e-06
9.42_357.2779m/z	357.278	9.41867	pos	THA	尼辛酸	HMDB0002007	6430	LMFA01030822	11792612	C24H36O2	1.79616	-2.0743	0.23745	Down	0.000266592
5.21_534.3038m/z	534.304	5.20868	pos	(5E)-7-{4,6-Dihydroxy-2-[(1E,5E)-3-hydroxyocta-1,5-dien-1-yl]oxan-3-yl}hept-5-enoylcarnitine		HMDB0241887				C27H45NO8	1.79569	1.29632	2.45601	Up	1.48747e-16
11.91_616.4104m/z	616.41	11.9116	pos	Fucoxanthinol		HMDB0252510			607588	C40H56O5	1.79358	1.42641	2.68777	Up	1.4142e-11
3.81_144.1745m/z	144.175	3.80547	pos	1-methyl-2-propyl-cyclopentane			98040	LMFA11000666	316554	C9H18	1.79347	-1.576	0.33541	Down	3.17475e-08
4.99_454.2397n	437.236	4.98623	pos	Ethyl cellulose	乙基纤维素	HMDB0033370	89214		24832091	C20H38O11	1.7931	1.33862	2.5291	Up	2.03804e-14
12.09_339.2541m/z	339.254	12.0864	neg	FAHFA(8:0/3-O-12:1)	脂肪酸羟基脂肪酸(8:0/3-O-12:1)			LMFA07090125		C20H36O4	1.78649	-1.68909	0.310123	Down	1.58479e-06
4.09_408.1968n	409.204	4.09453	pos	Gln-Val-Tyr	谷氨酰胺酰-缬氨酰-酪氨酸		17342		145455282	C19H28N4O6	1.78466	1.42266	2.6808	Up	1.35806e-11
5.31_738.4473n	738.447	5.31058	pos	PA(15:0/22:6-2OH(10S,17))	磷脂酸(15:0/22:6-2OH(10S,17))	HMDB0263246				C40H67O10P	1.78434	1.23678	2.35672	Up	2.40953e-19
11.09_415.2314m/z	415.231	11.0937	neg	Glutamylleucylarginine	谷氨酰亮氨酰精氨酸	HMDB0252758			18220317	C17H32N6O6	1.7748	2.16349	4.47996	Up	0.000587699
5.81_459.0936m/z	459.094	5.80703	neg	Apigenin 7-(6''-methylglucuronide)	芹菜素 7-(6''-甲基葡萄糖醛酸)			LMPK12110346	13844658	C22H20O11	1.77268	2.14638	4.42715	Up	0.000660339
7.66_454.1522m/z	454.152	7.66068	neg	Acetylcorynoline	乙酰紫堇灵		73548		177015	C23H23NO6	1.77015	-2.13215	0.228118	Down	0.000662692
4.10_271.9580m/z	271.958	4.09863	neg	2-Iodo-l-phenylalanine		HMDB0245177			3948024	C9H10INO2	1.76734	-1.72727	0.302023	Down	1.07228e-05
6.24_469.2877m/z	469.288	6.23925	pos	N-(2'-(4-benzenesulfonamide)-ethyl) arachidonoyl amine	N-(2'-(4-苯磺酰胺)-乙基)花生四烯丙基胺		36721	LMFA08020053	5283434	C28H42N2O3S	1.76699	1.38059	2.60375	Up	3.70814e-11
12.06_818.5317m/z	818.532	12.0573	pos	PS(18:0/22:6)	磷脂酰丝氨酸(18:0/22:6)	HMDB0010167	40825	LMGP03010040	24779546	C46H78NO10P	1.76653	1.94076	3.83907	Up	1.10413e-05
1.42_152.0584n	153.066	1.42213	pos	Nudifloramide	1-甲基-6-氧代吡啶-3-甲酰胺	HMDB0004193	7025		69698	C7H8N2O2	1.76446	-1.61173	0.327207	Down	1.22278e-06
4.82_753.3690m/z	753.369	4.82223	neg	Aspacoside D	天冬酰胺D			LMST02030247		C38H60O16	1.7617	1.46426	2.75921	Up	7.25045e-10
4.87_401.1942m/z	401.194	4.86963	pos	18-Hydroxycortisol	18-羟皮质醇	HMDB0000418	57881	LMST02030193	44263343	C21H30O6	1.75802	1.30397	2.46907	Up	1.01894e-13
14.34_648.6278m/z	648.628	14.3422	pos	Cer(d18:1/24:1)	神经酰胺(d18:1/24:1)	HMDB0004953	7206	LMSP02010009	5283568	C42H81NO3	1.7545	-1.68811	0.310334	Down	1.76623e-06
6.90_314.2320m/z	314.232	6.9009	pos	5-Decenoylcarnitine	5-癸酰肉碱	HMDB0241071				C17H31NO4	1.75054	-1.40853	0.376696	Down	1.49901e-09
9.70_413.1639m/z	413.164	9.6963	neg	AB-Fubinaca		HMDB0247739			86567357	C20H21FN4O2	1.75033	1.33387	2.52077	Up	3.39169e-13
5.90_353.0339m/z	353.034	5.90298	neg	Dihydronaringenin-O-sulphate	二氢柚皮素-O-硫酸盐	HMDB0059996			122231132	C15H14O8S	1.7481	-2.34753	0.196483	Down	0.00134577
9.02_218.1299m/z	218.13	9.01598	pos	5,7,9,11,13-tetradecapentaenoic acid	5,7,9,11,13-十四碳五烯酸		34922	LMFA01030258	5312410	C14H18O2	1.74807	1.49298	2.8147	Up	9.66607e-09
5.68_202.1799m/z	202.18	5.68017	pos	11-amino-undecanoic acid	11-氨基十一酸		35923	LMFA01100004	17083	C11H23NO2	1.74789	-1.64374	0.320026	Down	2.79963e-07
6.14_424.1980m/z	424.198	6.14497	neg	O-Desmethyltramadol glucuronide		HMDB0060856			29919004	C21H31NO8	1.74499	-1.89684	0.26853	Down	9.45346e-05
9.06_508.2304n	531.22	9.05942	pos	Gibberellin A37 glucosyl ester	赤霉素A37葡萄糖酯	HMDB0038611	93272		156908048	C26H36O10	1.74106	-2.34414	0.196945	Down	0.00257278
6.28_302.2321m/z	302.232	6.27552	pos	7-Methyloctanoylcarnitine	7-甲基辛酰肉碱	HMDB0241051			134160342	C16H31NO4	1.73896	-1.74704	0.297912	Down	3.40477e-05
0.77_148.9820m/z	148.982	0.77205	pos	Hexafluoropropylene oxide	六氟环氧丙烷的均聚物	HMDB0253135			9883	C3F6O	1.73634	-1.70102	0.30757	Down	4.39335e-06
10.56_305.1394m/z	305.139	10.5585	neg	Blumealactone C	蓝梅内酯 C	HMDB0035357	90657		14021261	C17H24O6	1.73496	1.34705	2.54392	Up	7.73008e-11
8.55_395.1899m/z	395.19	8.54553	neg	Pregnenolone sulfate	硫酸孕烯醇酮	HMDB0000774	5740		20845972	C21H32O5S	1.73417	-2.09212	0.234536	Down	0.00048271
6.91_464.3020m/z	464.302	6.91133	neg	3a,7b,12a-Trihydroxyoxocholanyl-Glycine	3a,7b,12a-三羟基氧胆酰基-甘氨酸	HMDB0000331	58003	LMST05030007	44263376	C26H43NO6	1.73302	1.80874	3.50336	Up	1.38635e-05
4.24_430.2411n	448.275	4.23953	pos	Nivacortol		HMDB0255670			14751698	C28H31FN2O	1.73085	1.33382	2.52069	Up	7.71869e-12
4.13_339.1661m/z	339.166	4.13315	neg	TIADENOL		HMDB0259066				C14H30O2S2	1.72908	1.38051	2.6036	Up	2.21086e-10
5.23_397.1846m/z	397.185	5.2325	neg	Ethyl 7-epi-12-hydroxyjasmonate glucoside	7-表-12-羟基茉莉酮酸乙酯葡萄糖苷	HMDB0036340	91484		131751966	C20H32O9	1.72744	1.60076	3.03303	Up	2.07595e-07
8.85_414.2996m/z	414.3	8.84852	pos	N-docosahexaenoyl GABA	N-二十二碳六烯酰γ－氨基丁酸		75487	LMFA08020105	16759346	C26H39NO3	1.72531	1.84229	3.5858	Up	3.24247e-05
8.10_356.2250m/z	356.225	8.10378	pos	1-(3,5-Dimethyl-1-phenyl-4-pyrazolyl)-N-[4-(phenylmethyl)-1-piperazinyl]methanimine		HMDB0246125			1356208	C23H27N5	1.72476	1.80307	3.48961	Up	7.06937e-05
8.83_339.2679m/z	339.268	8.828	pos	Docosahexaenoic Acid ethyl ester	2,4,6,8,10,12-二十二碳六烯酸乙酯		62947		6440152	C24H36O2	1.72451	1.82934	3.55374	Up	3.51169e-05
4.34_474.2673n	492.301	4.34385	pos	Amastatin		HMDB0248277			3237	C21H38N4O8	1.7234	1.29243	2.4494	Up	9.19475e-13
4.87_391.2344m/z	391.234	4.86963	pos	7,8-Dihydro-3b,6a-dihydroxy-alpha-ionol 9-glucoside	7,8-二氢-3b,6a-二羟基-α-紫罗兰醇9-葡萄糖苷	HMDB0041578	95958		85161713	C19H34O8	1.72112	1.25542	2.38736	Up	7.17747e-14
5.88_300.2166m/z	300.217	5.8796	pos	Non-5-enoylcarnitine	壬-5-烯酰肉碱	HMDB0241746				C16H29NO4	1.7204	-1.67939	0.312214	Down	2.4018e-05
7.11_397.2209m/z	397.221	7.10593	neg	7-[(1R,2R,3R)-3-Hydroxy-2-[(3S)-3-hydroxyoct-1-enyl]-5-oxocyclopentyl]-5-heptenoic acid	7-[(1R,2R,3R)-3-羟基-2-[(3S)-3-羟基辛-1-烯基]-5-氧代环戊基]-5-庚烯酸	HMDB0247796			158	C20H32O5	1.71969	1.38267	2.60751	Up	4.08883e-10
6.14_459.2200m/z	459.22	6.14497	neg	Cowanin		HMDB0304611				C29H34O6	1.719	-1.88686	0.270395	Down	0.000132413
4.10_364.9674m/z	364.967	4.09863	neg	D-sedoheptulose-1,7-bisphosphate		HMDB0304323				C7H12O13P2-4	1.71891	-1.82145	0.282937	Down	0.000131185
4.22_309.0818m/z	309.082	4.21905	pos	Indoxyl glucuronide	吲哚基葡糖醛酸	HMDB0010319	61642		2733785	C14H15NO7	1.71748	-1.88218	0.271274	Down	0.000210848
4.39_376.1517m/z	376.152	4.38888	neg	Imidaprilat	咪达普利拉	HMDB0041908	96173		5464344	C18H23N3O6	1.71353	1.48598	2.80108	Up	6.646e-08
4.75_198.1276m/z	198.128	4.75195	pos	2-(3-Phenylpropyl)pyridine	2-(3-苯丙基)吡啶	HMDB0036173	91322		459494	C14H15N	1.71319	1.78839	3.45429	Up	1.96559e-05
12.08_374.3023m/z	374.302	12.0778	pos	N-myristoyl glutamine				LMFA08020219	53851439	C19H36N2O4	1.71112	-2.30305	0.202634	Down	0.000926177
4.57_364.0815m/z	364.082	4.57293	neg	2-S-glutathionyl acetate		HMDB0062198	70367		11954071	C12H19N3O8S	1.70834	1.53232	2.8925	Up	6.35341e-08
9.54_321.1343m/z	321.134	9.53593	neg	Acetylpterosin C	乙酰蝶素C	HMDB0030764	87183		5316039	C16H20O4	1.70539	1.46962	2.76949	Up	6.43043e-08
6.86_224.1278m/z	224.128	6.86482	pos	Polihexanide		HMDB0245739			20977	C8H19N5	1.70479	-1.73255	0.300919	Down	1.21702e-05
10.95_792.5754m/z	792.575	10.9465	neg	Phosphatidylethanolamine		HMDB0060501			17754131	C41H82NO8P	1.70368	1.56551	2.95983	Up	5.30055e-07
7.40_273.1481m/z	273.148	7.39622	pos	Quadrangolin A	四角灵A; 2-[(1S,2S,4aR,8aS)-1-羟基-4a-甲基-8-亚甲基十氢-2-萘基]丙烯酸		985308		133556420	C15H22O3	1.70303	1.9658	3.90629	Up	0.000217035
8.83_265.1506m/z	265.151	8.828	pos	Threoninyl-Gamma-glutamate	苏氨酰-γ-谷氨酸	HMDB0029075	85968		131750786	C9H17N3O5	1.70166	1.81573	3.52037	Up	5.12279e-05
7.99_980.6087m/z	980.609	7.98957	pos	PI(PGF1alpha/20:2)	磷脂酰肌醇(PGF1alpha/20:2)	HMDB0277268				C49H87O16P	1.69939	-1.46876	0.361293	Down	1.2761e-06
4.32_280.1544m/z	280.154	4.32313	pos	Lisofylline	3,7-二氢-1-(5-羟基己基)-3,7-二(三氘甲基)-1H-嘌呤-2,6-二酮	HMDB0243557	314755		57782	C13H20N4O3	1.69763	-1.79847	0.287479	Down	0.000120441
7.40_429.2874n	430.295	7.39622	pos	N-Docosahexaenoyl Threonine	N-二十二碳六烯酰苏氨酸	HMDB0242022				C26H39NO4	1.69563	1.93426	3.82183	Up	0.00017373
3.54_195.1125m/z	195.113	3.5376	pos	1,2,3,4-Tetrahydroisoquinolin-1-yl formate	1,2,3,4-四氢异喹啉-1-甲酸酯	HMDB0258099			56990431	C10H11NO2	1.69503	-1.39425	0.380442	Down	5.61144e-08
5.03_434.2423n	417.239	5.02715	pos	Lexibulin		HMDB0254071			56675648	C24H30N6O2	1.68983	1.21469	2.32092	Up	1.93588e-13
5.25_165.0551m/z	165.055	5.25148	neg	2,3-Dihydrobenzofuran	2,3-二氢苯并呋喃	HMDB0013815	85270		10329	C8H8O	1.68681	1.52143	2.87075	Up	1.00489e-06
5.14_300.0116m/z	300.012	5.13737	neg	Sparfosic acid		HMDB0258406			4312	C6H10NO8P	1.6837	-1.89921	0.26809	Down	0.000221068
10.24_265.1430m/z	265.143	10.2422	pos	2-Carboxy-4-dodecanolide	2-羧基-4-十二内酯	HMDB0030987	87331		85931447	C13H22O4	1.6785	-1.75304	0.296675	Down	2.91712e-05
7.71_330.2634m/z	330.263	7.70923	pos	4,8 dimethylnonanoyl carnitine		HMDB0006202	58362	LMFA07070046	53477801	C18H35NO4	1.67768	-1.77939	0.291307	Down	0.000324603
12.04_862.5575m/z	862.558	12.0377	pos	PC(20:5-3OH/P-18:0)	磷脂酰胆碱(20:5-3OH/P-18:0)	HMDB0289600				C46H82NO10P	1.67635	1.50895	2.84604	Up	2.49603e-07
5.49_449.0115m/z	449.012	5.48782	neg	8-Hydroxyquinoline-5-sulfonic acid	8-羟基喹啉-5-磺酸	HMDB0247444				C9H7NO4S	1.67568	-2.15699	0.224223	Down	0.00185156
4.63_408.2510m/z	408.251	4.63035	pos	Leu-Leu-Tyr	亮氨酰-亮氨酰-酪氨酸	HMDB0304804	68996		88513	C21H33N3O5	1.67416	1.56154	2.95169	Up	2.85466e-07
5.83_281.0102m/z	281.01	5.83245	neg	EMODIC ACID	4,5,7-三羟基-9,10-二氧代-9,10-二氢蒽-2-羧酸		43825		361510	C15H8O7	1.67369	-1.77987	0.29121	Down	9.64696e-05
4.99_385.1693m/z	385.169	4.985	neg	2-Phenylindole	2-苯基吲哚	HMDB0245294	342087		13698	C14H11N	1.67332	-2.20405	0.217027	Down	0.00142674
4.67_463.2529m/z	463.253	4.6692	pos	Citronellyl beta-sophoroside	香茅基β-槐糖苷	HMDB0032839	88759		131751330	C22H40O11	1.6723	1.53232	2.89251	Up	9.66504e-07
1.73_253.1179m/z	253.118	1.72785	pos	Alanyltyrosine	丙氨酰酪氨酸	HMDB0028699	23768		92946	C12H16N2O4	1.6711	-1.55543	0.340227	Down	2.16175e-05
4.99_566.3221n	584.356	4.98623	pos	25-Cinnamoyl-vulgaroside		HMDB0041367	95772		131753123	C34H46O7	1.66968	1.09923	2.14241	Up	1.24879e-17
6.57_158.1537m/z	158.154	6.5655	pos	2,6-Nonadien-1-ol	反-2，顺6-壬二烯醇	HMDB0031262			92450317	C9H16O	1.6683	-1.3689	0.387187	Down	1.13703e-08
9.21_343.2627m/z	343.263	9.21132	pos	TrHA			74389	LMFA01030853	44390819	C23H34O2	1.66572	-1.78009	0.291165	Down	7.59362e-05
6.67_314.2320m/z	314.232	6.67225	pos	Decenoylcarnitine	癸烯酰肉碱	HMDB0250918			129628702	C17H31NO4	1.66534	-1.32956	0.397889	Down	1.36291e-08
5.09_490.2776m/z	490.278	5.08512	pos	Lucidenic acid K	透明酸K	HMDB0035890	91094		131751879	C27H36O7	1.66521	1.14227	2.20729	Up	5.48359e-15
4.75_357.1666m/z	357.167	4.75195	pos	L-Citronellol glucoside	L-香茅醇葡萄糖苷	HMDB0029850	86545		14239337	C16H30O6	1.66447	1.19904	2.29587	Up	1.53999e-12
4.77_166.0353m/z	166.035	4.77232	pos	8-Oxoguanine		HMDB0041820	96151		119315	C5H3N5O2	1.66289	1.7383	3.33641	Up	9.15701e-05
6.56_525.2708m/z	525.271	6.56238	neg	Neoandrographolide	新穿心莲内酯		985467		9848024	C26H40O8	1.66274	-1.93627	0.261292	Down	0.000533836
4.87_182.1901m/z	182.19	4.86963	pos	5-Ethyl-3-methyl-2E,4E,6E-nonatriene			97466	LMFA11000051	11805103	C12H20	1.66217	-1.27055	0.414501	Down	2.18628e-10
4.95_544.3091n	562.343	4.94832	pos	Gracilosulfate B				LMST05020053		C28H48O8S	1.66204	1.08497	2.12134	Up	3.27626e-18
12.04_251.0462m/z	251.046	12.0377	pos	Diphenyl phosphate	磷酸二苯酯	HMDB0251449	320267		13282	C12H11O4P	1.66017	-1.1523	0.449906	Down	2.27381e-14
4.50_299.1135m/z	299.114	4.50352	pos	PC(2:0/0:0)	磷脂酰胆碱(2:0/0:0)		40309	LMGP01050043	5311264	C10H22NO7P	1.65889	1.24288	2.36671	Up	1.1903e-10
14.00_483.1753m/z	483.175	13.9965	neg	Thymidine	胸苷	HMDB0000273	3375		5789	C10H14N2O5	1.65105	1.6506	3.13963	Up	1.22959e-05
5.63_530.1649m/z	530.165	5.63425	neg	Fluoxetine glucuronide	1-脱氧-1-[甲基[3-苯基-3-[4-(三氟甲基)苯氧基]丙基]氨基]-BETA-D-吡喃葡萄糖醛酸	HMDB0060607			71316864	C23H26F3NO7	1.64636	-1.93795	0.260987	Down	0.00163473
4.93_806.4503n	829.439	4.9276	pos	Cellulose hydroxyethylate		HMDB0249797			4327536	C36H70O19	1.64341	1.1403	2.20427	Up	1.14236e-13
5.03_468.2646m/z	468.265	5.02715	pos	Tobramycin	妥布霉素	HMDB0014822	2863		36294	C18H37N5O9	1.6428	1.12075	2.1746	Up	1.14245e-14
14.98_415.3561m/z	415.356	14.985	pos	Esters	胆甾烯基甲酸酯	HMDB0302228			165217	C28H46O2	1.64245	-1.30116	0.405799	Down	1.72123e-09
12.10_815.4972n	798.494	12.0977	pos	PS(18:3/18:1-2OH)	磷脂酰丝氨酸(18:3/18:1-2OH)	HMDB0281891				C42H74NO12P	1.63918	1.54334	2.91468	Up	2.20883e-06
7.70_523.2872m/z	523.287	7.69752	pos	Mupirocin	莫匹罗星	HMDB0014554	43266		446596	C26H44O9	1.63466	-1.67701	0.312731	Down	6.51712e-05
6.10_231.0331m/z	231.033	6.10118	neg	2-(4-Methoxyphenyl)ethyl hydrogen sulfate		HMDB0304915			88463799	C9H12O5S	1.63228	-2.08156	0.236259	Down	0.00166074
9.70_381.2261m/z	381.226	9.6963	neg	PGB1	前列腺素 B1	HMDB0002982	408	LMFA03010131	5280388	C20H32O4	1.62969	1.15955	2.23388	Up	1.47267e-12
5.82_133.0650m/z	133.065	5.82437	neg	2-Isopropyl-1,4-benzenediol	2-异丙基对苯二酚	HMDB0032132	88214		75370	C9H12O2	1.62695	-1.75745	0.29577	Down	0.00013023
5.61_451.1411m/z	451.141	5.61237	neg	7-Methyl-2-(2-furyl)-1,8-naphthyridine-4(1H)-one	血红蛋白	HMDB0247633			13285535	C13H10N2O2	1.62653	-2.23361	0.212626	Down	0.00419748
4.67_424.2287m/z	424.229	4.6692	pos	3'-Hydroxybuspirone	3'-羟基丁螺环酮	HMDB0061108			59058967	C21H31N5O3	1.62274	1.30869	2.47717	Up	7.26493e-09
6.92_600.2772m/z	600.277	6.92132	neg	Gly-arg-gly-glu-ser-pro		HMDB0252941			14796483	C23H39N9O10	1.6227	1.87911	3.67847	Up	0.000531411
4.22_105.0337m/z	105.034	4.21905	pos	Tropolone	环庚三烯酚酮	HMDB0259299	70933		10789	C7H6O2	1.61966	-1.4134	0.375425	Down	9.14799e-07
5.43_197.1145m/z	197.115	5.43212	pos	(+)-3-hydroxy pelargonic acid	3-羟基壬酸	HMDB0031513	35407	LMFA01050025	36599	C9H18O3	1.61939	-1.10744	0.464115	Down	1.09282e-13
5.49_303.0074m/z	303.007	5.48782	neg	Ethylene glycol dinitrate	乙二醇二硝酸酯	HMDB0252070			40818	C2H4N2O6	1.61893	-1.94525	0.25967	Down	0.00148883
7.58_255.1563m/z	255.156	7.58078	pos	6-Deoxypenciclovir	泛昔洛韦USP RC A	HMDB0247053			128517	C10H15N5O2	1.61802	-1.0747	0.474771	Down	3.21746e-15
4.22_263.0286m/z	263.029	4.21538	neg	Ethidimuron	赛唑隆,磺噻隆		72834		91596	C7H12N4O3S2	1.61252	-1.80775	0.285635	Down	0.000377225
5.29_526.2624n	526.262	5.29025	pos	2-O-(beta-D-galactopyranosyl-(1->6)-beta-D-galactopyranosyl) 2S-hydroxyundecanoic acid	2-O-(β-D-吡喃半乳糖基-(1->6)-β-D-吡喃半乳糖基) 2S-羟基十一烷酸			LMFA13010047	56936281	C23H42O13	1.61217	1.12447	2.18022	Up	3.88188e-12
0.71_227.1247m/z	227.125	0.711317	pos	(2xi,6xi)-7-Methyl-3-methylene-1,2,6,7-octanetetrol		HMDB0033217	89084	LMFA05000554	15382184	C10H20O4	1.60814	-1.61145	0.327268	Down	7.59318e-05
5.15_509.3115n	509.312	5.14635	pos	PS(P-18:0/0:0)	磷脂酰丝氨酸(P-18:0/0:0)		78865	LMGP03070002	52926305	C24H48NO8P	1.60619	1.05258	2.07423	Up	1.41654e-15
9.20_481.2810m/z	481.281	9.2016	neg	(-)-Salvisyriacolide	(-)-丹参内酯		53744	LMPR0105040002	42608278	C25H40O6	1.60512	-1.53693	0.344619	Down	0.000103284
5.64_210.0217m/z	210.022	5.6408	pos	6-Hydroxyindoxyl sulfate	6-羟吲哚硫酸盐	HMDB0304937				C9H9NO4S	1.60386	-1.08287	0.47209	Down	1.84394e-14
4.99_446.2514m/z	446.251	4.98623	pos	Xanthine amine congener		HMDB0259918				C21H28N6O4	1.60057	1.05535	2.07822	Up	4.07196e-15
6.72_289.1213m/z	289.121	6.71852	neg	Etomidate	依托咪酯	HMDB0014437	2640		667484	C14H16N2O2	1.59939	2.00797	4.02215	Up	0.00235407
4.10_212.0020m/z	212.002	4.09863	neg	Indoxyl sulfate	硫酸吲哚酚	HMDB0000682	253		10258	C8H7NO4S	1.59718	-1.57368	0.33595	Down	0.000173083
7.66_340.2479m/z	340.248	7.66285	pos	(8Z,10E)-Dodeca-8,10-dienoylcarnitine	(8Z,10E)-十二-8,10-二烯酰肉碱	HMDB0241245				C19H33NO4	1.59634	-1.21554	0.430613	Down	1.9932e-08
7.40_465.3085n	466.316	7.39622	pos	Glycocholic acid	甘氨胆酸	HMDB0000138	202	LMST05030001	10140	C26H43NO6	1.59512	1.72926	3.31558	Up	0.000226081
10.97_397.1686m/z	397.169	10.9671	neg	Eugenosedin-A		HMDB0252125			85122229	C23H29ClN2O3	1.59456	1.26876	2.40954	Up	3.22455e-09
4.12_243.9922m/z	243.992	4.11617	neg	5-Mercapto-2-nitro-benzoic acid	硫代硝基苯甲酸	HMDB0245253			123648	C7H5NO4S	1.59333	-1.49244	0.35541	Down	4.25118e-05
3.94_365.1779m/z	365.178	3.94205	pos	Eliprodil	依利罗地	HMDB0251748			60703	C20H23ClFNO	1.59061	1.1863	2.27569	Up	4.24711e-10
5.15_449.2670n	467.301	5.14635	pos	6-(3-(Pyrrolidin-1-yl)propoxy)-2-(4-(3-(pyrrolidin-1-yl)propoxy)phenyl)benzo[d]oxazole		HMDB0251669			45102599	C27H35N3O3	1.59059	1.06958	2.09883	Up	7.52347e-14
4.23_314.0260m/z	314.026	4.23048	neg	Rimeporide		HMDB0257559				C11H15N3O5S2	1.58871	-1.68672	0.310633	Down	0.000270886
12.15_381.2261m/z	381.226	12.1511	neg	N-(2,3-Dihydroxypropyl)valine		HMDB0254994			23088918	C8H17NO4	1.58266	-1.55451	0.340445	Down	3.08989e-05
4.97_393.2500m/z	393.25	4.96838	pos	Leu-Pro-Phe	亮氨酰-脯氨酰-苯丙氨酸		20555		25183214	C20H29N3O4	1.58045	1.09853	2.14137	Up	4.98651e-12
7.36_207.1741m/z	207.174	7.36225	pos	Dihydro-1,1,2,3,3-pentamethyl-4(5H)-indanone	开司米酮		318041		92292	C14H22O	1.57984	-1.10394	0.465243	Down	9.06358e-11
4.05_296.2142m/z	296.214	4.05477	pos	Henicosa-4E,10Z,12Z,20-tetraen-1,14-diyn-3-ol				LMFA05000743	21777850	C21H28O	1.57674	1.95804	3.88533	Up	0.0040663
6.09_176.0704m/z	176.07	6.09042	pos	Dehydromatricaric acid				LMFA01031042	21718060	C10H6O2	1.57648	-1.35932	0.389765	Down	2.06369e-06
6.84_358.2582m/z	358.258	6.84067	pos	(9Z)-3-hydroxydodecenoylcarnitine	(9Z)-3-羟基十二碳烯酰肉碱	HMDB0240760		LMFA07070024	71464579	C19H35NO5	1.57409	-1.50965	0.351197	Down	7.61626e-05
5.47_245.0488m/z	245.049	5.47007	neg	2,2-Difluoro-n-(2-hydroxyethyl)-3-(2-nitro-1h-imidazol-1-yl)propanamide		HMDB0253829			366729	C8H10F2N4O4	1.57395	-2.0448	0.242356	Down	0.00520562
0.72_133.1101n	151.144	0.719367	pos	2-(2-Hydroxypropan-2-ylamino)propan-2-ol	2-(2-羟基丙-2-氨基)丙-2-醇	HMDB0257796			9833967	C6H15NO2	1.57205	-1.7729	0.292621	Down	0.00232659
2.70_231.0837m/z	231.084	2.69883	pos	Ethyl beta-D-fructofuranoside		HMDB0303035				C8H16O6	1.57014	1.10115	2.14525	Up	8.23798e-12
7.68_306.2555n	289.252	7.68043	pos	Eicosa-11,14,17-trienoic acid	二十碳三烯酸	HMDB0244373	35042		3210	C20H34O2	1.56989	-1.50065	0.353394	Down	4.71482e-05
10.18_307.1551m/z	307.155	10.1806	neg	Homosalate	胡莫柳酯	HMDB0253209	4065		8362	C16H22O3	1.56984	1.16403	2.24082	Up	4.07413e-10
8.07_471.2426m/z	471.243	8.07062	neg	3-keto-petromyzonol sulfate				LMST04010454	76966282	C24H40O7S	1.56825	-2.06662	0.238718	Down	0.00749373
6.12_130.0651m/z	130.065	6.11745	pos	Indole-3-carbinol	吲哚-3-甲醇	HMDB0005785	44445		3712	C9H9NO	1.56797	-1.37437	0.385721	Down	6.11158e-06
5.61_413.2006m/z	413.201	5.61237	neg	3beta,5beta,14beta,16beta-tetrahydroxy-19-oxo-bufa-20,22-dienolide	3β,5β,14β,16β-四羟基-19-氧代-bufa-20,22-二烯内酯			LMST01130044		C24H32O7	1.56603	-1.73911	0.299554	Down	0.000522816
12.61_876.6817m/z	876.682	12.6095	pos	PC(24:1/20:3)	磷脂酰胆碱(24:1/20:3)	HMDB0008804	60250		53479519	C52H96NO8P	1.56595	-1.03312	0.488652	Down	3.00812e-13
11.47_368.2804m/z	368.28	11.4749	neg	Anandamide (18:2, n-6)	亚油酰乙醇酰胺	HMDB0012252	3718	LMFA08040004	5283446	C20H37NO2	1.56319	1.48088	2.79119	Up	3.58731e-05
4.83_490.3219m/z	490.322	4.83177	pos	Vertilmicin		HMDB0242753			72822913	C22H43N5O7	1.56201	1.31082	2.48082	Up	2.84367e-07
4.81_388.2004n	371.197	4.8118	pos	Ramiprilat	雷米普利	HMDB0060579	2244		5464096	C21H28N2O5	1.56144	1.05061	2.07141	Up	5.6045e-13
5.91_462.1774m/z	462.177	5.90925	neg	icas#7				LMFA13040127	86289730	C22H27NO7	1.55631	-1.79072	0.289028	Down	0.00375807
10.03_383.2419m/z	383.242	10.034	neg	15-Dihydroxyeicosatrienoic acid	15-二羟基二十碳三烯酸	HMDB0244665				C20H34O4	1.55502	1.33425	2.52144	Up	4.04683e-07
6.35_488.1930m/z	488.193	6.34907	neg	CAY10622			64836		44819541	C25H25N5O3	1.5528	-1.48626	0.356937	Down	0.000204797
4.24_163.1480m/z	163.148	4.23953	pos	Pregeijerene		HMDB0036759	91785		21160126	C12H18	1.54986	-1.05602	0.480958	Down	3.22898e-11
6.40_643.3704m/z	643.37	6.39903	neg	Kurilensoside G				LMST05050016	25232748	C32H54O10	1.54979	1.49759	2.8237	Up	9.52138e-05
4.57_274.1120m/z	274.112	4.57293	neg	Paclobutrazol		HMDB0256072				C15H20ClN3O	1.54793	1.20558	2.3063	Up	7.86298e-09
2.12_249.0492m/z	249.049	2.12188	neg	zardaverine	扎达维林	HMDB0259989				C12H10F2N2O3	1.54708	1.06325	2.08963	Up	6.44271e-11
3.81_102.1279m/z	102.128	3.80547	pos	Cyclohexane	环己烷-D11	HMDB0029597	68937		8078	C6H12	1.54556	-1.2363	0.42446	Down	3.40429e-07
11.43_447.2392m/z	447.239	11.4314	neg	Gamabufotalin	和蟾蜍他灵		71464	LMST01130026	259803	C24H34O5	1.54304	-1.45625	0.36444	Down	1.7619e-05
6.27_201.1482m/z	201.148	6.26955	pos	Ethyl-L-NIO			45488		5289555	C9H19N3O2	1.54124	-1.13864	0.454187	Down	1.22589e-09
7.28_316.2478m/z	316.248	7.28428	pos	3-Methylnonanoylcarnitine	3-甲基壬酰肉碱	HMDB0240791				C17H33NO4	1.53562	-1.16461	0.446086	Down	6.40323e-08
11.03_720.5879m/z	720.588	11.0279	pos	PC(O-14:0/18:0)	磷脂酰胆碱(O-14:0/18:0)		40044	LMGP01020015	24779278	C40H82NO7P	1.53462	-1.0626	0.47877	Down	3.7554e-11
5.99_411.1849m/z	411.185	5.99018	neg	Ptilosteroid B	紫檀甾醇B		84303	LMST02030213	42640655	C21H34O7S	1.53238	-1.77576	0.292041	Down	0.0014898
9.70_313.2385m/z	313.239	9.6963	neg	8R,11S-DiHOME	8R,11S-二氢亚胺		96882	LMFA02000063	56935843	C18H34O4	1.53062	1.02288	2.03198	Up	1.2707e-12
6.34_169.1228m/z	169.123	6.33862	neg	2,6-Dimethylocta-cis-2,7-diene-1,6-diol	2,6-二甲基八-顺-2,7-二烯-1,6-二醇	HMDB0302472			5352452	C10H18O2	1.52731	1.20495	2.30529	Up	6.6171e-08
12.06_840.5442m/z	840.544	12.0573	pos	PE(22:5/20:2)	磷脂酰乙醇胺(22:5/20:2)	HMDB0009660	61049		53479956	C47H80NO8P	1.52632	1.35123	2.5513	Up	2.38219e-06
10.75_822.6345m/z	822.634	10.7499	pos	PC(20:0/P-18:1)	磷脂酰胆碱(20:0/P-18:1)	HMDB0008294	59740		53478893	C46H90NO7P	1.52554	-1.03456	0.488165	Down	1.5338e-12
9.01_381.2261m/z	381.226	9.00608	neg	PGF2alpha-1,9-lactone	前列腺素F2α-1,9-内酯		45951	LMFA03010196	42607298	C20H32O4	1.52467	1.09566	2.13711	Up	5.40266e-10
4.67_325.1951m/z	325.195	4.6692	pos	Arginyllysine		HMDB0028714	23816		6427006	C12H26N6O3	1.5226	1.19405	2.28794	Up	3.83447e-08
4.57_296.0938m/z	296.094	4.57293	neg	Citpressine II	西加压素II	HMDB0029324	86188		5494828	C17H17NO5	1.52242	1.2156	2.32237	Up	4.9192e-08
7.68_573.1369m/z	573.137	7.67802	neg	ML130			417123		1088438	C14H13N3O2S	1.52225	-1.84925	0.277536	Down	0.00497475
7.47_316.1174m/z	316.117	7.46558	pos	6-Isopropoxy-9-oxoxanthene-2-carboxylic acid	6-异丙氧基-9-氧代氧杂蒽-2-羧酸	HMDB0248069	45603		119461	C17H14O5	1.52163	-1.76056	0.295134	Down	0.00178553
8.43_387.2523m/z	387.252	8.43057	pos	(22E)-1alpha,3beta-Dihydroxychola-5,16,22-trien-24-oic Acid	(22E)-1α,3β-二羟基胆酸-5,16,22-三烯-24-油酸		84651	LMST04010342	5284089	C24H34O4	1.52113	-1.37362	0.385921	Down	4.52028e-05
4.79_345.1551m/z	345.155	4.79457	pos	ROXATIDINE	罗沙替丁	HMDB0257317				C17H26N2O3	1.51882	1.31717	2.49177	Up	2.67555e-06
4.55_271.1298m/z	271.13	4.54702	pos	N-Acetylvanilalanine	N-乙酰香草氨酸	HMDB0011716	62449		12681285	C12H15NO5	1.51383	1.21707	2.32473	Up	2.93748e-07
4.15_364.0474m/z	364.047	4.15377	neg	Fludarabine	磷酸氟达拉滨	HMDB0015206	675		30751	C10H13FN5O7P	1.51159	-1.6381	0.321279	Down	0.00165413
5.32_473.1456m/z	473.146	5.32323	neg	Enterolactone 3''-glucuronide	肠内酯 3''-葡糖苷酸	HMDB0240433			155926115	C24H26O10	1.51089	-1.90694	0.266657	Down	0.00421654
9.00_353.2293m/z	353.229	8.99515	pos	5-epi-5-iso-LGE2			75071	LMFA03100017	52921917	C20H32O5	1.50989	-1.2387	0.423754	Down	1.25013e-06
7.00_889.5326m/z	889.533	6.99563	pos	PS(20:4/22:5-O)	磷脂酰丝氨酸(20:4/22:5-O)	HMDB0282651				C48H74NO11P	1.50885	1.16895	2.24848	Up	4.57235e-08
8.17_506.2157n	505.208	8.17053	neg	Isolimonic acid	异柠檬酸	HMDB0038170	92907		131752314	C26H34O10	1.50573	-1.95921	0.25717	Down	0.00694059
10.20_451.2290m/z	451.229	10.2037	neg	1-(18-mercaptooctadecanoyl)-sn-glycerol 3-phosphate				LMGP10050040	53477643	C21H43O7PS	1.50518	1.37675	2.59683	Up	8.70734e-06
9.01_313.2385m/z	313.239	9.00608	neg	9,13-DiHOME(10)	9,13-二氢-11-十八烯酸		35502	LMFA02000162	5282959	C18H34O4	1.50421	1.04508	2.06349	Up	1.36896e-10
6.57_202.2163m/z	202.216	6.5655	pos	Laurylaldehyde	十二醛	HMDB0033933	36591	LMFA06000071	8194	C12H24O	1.50015	-1.14864	0.451052	Down	4.8357e-08
5.82_332.2427m/z	332.243	5.82473	pos	6-Hydroxydecanoylcarnitine	6-羟基癸酰肉碱	HMDB0241057				C17H33NO5	1.49937	-1.14302	0.452812	Down	1.884e-07
10.85_194.0818m/z	194.082	10.8494	neg	2-Aminopropiophenone	卡西酮	HMDB0245024	2011		107786	C9H11NO	1.49911	-1.15897	0.447832	Down	4.80371e-07
8.57_263.1880n	264.195	8.57492	pos	Desvenlafaxine	文拉法辛杂质	HMDB0015646	3006		125017	C16H25NO2	1.49828	-1.80377	0.286425	Down	0.000990291
11.89_705.4456m/z	705.446	11.8909	pos	OKODA-PE				LMGP20020048	134812378	C35H62NO10P	1.49639	1.19682	2.29234	Up	1.37965e-07
9.41_437.2909m/z	437.291	9.40688	neg	Isochenodeoxycholic acid	熊去氧胆酸杂质K	HMDB0000361	5350	LMST04010034	164673	C24H40O4	1.49232	-1.81146	0.284903	Down	0.0065579
7.25_513.2710m/z	513.271	7.24702	neg	18-acetoxy-PGF2alpha-11-acetate methyl ester				LMFA03010099	5283091	C25H40O8	1.48989	-1.53617	0.344799	Down	0.00148922
7.11_329.2335m/z	329.233	7.10593	neg	9,10,18-TriHOME(12)			35685	LMFA02000222	5312878	C18H34O5	1.48867	1.02775	2.03885	Up	3.58861e-10
3.86_305.0338m/z	305.034	3.86147	neg	4-Hydroxy-5-(dihydroxyphenyl)-valeric acid-O-sulphate	4-羟基-5-(二羟基苯基)-戊酸-O-硫酸盐	HMDB0059978			131769796	C11H14O8S	1.48756	-1.60696	0.328289	Down	0.00252772
4.81_223.0962m/z	223.096	4.8118	pos	tert-Butyl hydrogen phthalate	邻苯二甲酸氢叔丁酯		317201		134976	C12H14O4	1.48615	-1.24942	0.420618	Down	4.19043e-06
4.22_467.0659m/z	467.066	4.21538	neg	Acetyl citrate		HMDB0059808			54454045	C8H10O8	1.48422	-1.65302	0.317974	Down	0.00320888
11.35_643.2894m/z	643.289	11.3462	neg	PI(22:6/0:0)	磷脂酰肌醇(22:6/0:0)			LMGP06050012	52928607	C31H49O12P	1.48241	1.15518	2.22713	Up	1.22423e-06
7.45_691.3375m/z	691.337	7.45293	neg	Echinasteroside C 15-O-sulfate				LMST05050018	52931572	C33H56O13S	1.47775	1.80403	3.49194	Up	0.0053753
0.69_189.1344m/z	189.134	0.693217	pos	H-HoArg-OH	高精氨酸	HMDB0000670	5640		9085	C7H16N4O2	1.47393	-1.11786	0.460777	Down	8.57358e-07
9.89_473.2312m/z	473.231	9.88687	neg	PA(2:0/18:1-O(9S,10R))	磷脂酸(2:0/18:1-O(9S,10R))	HMDB0266541				C23H41O9P	1.47332	1.61124	3.05515	Up	0.00128881
5.82_213.0224m/z	213.022	5.82437	neg	4-Allylphenol sulfate	4-烯丙基苯酚硫酸盐	HMDB0170765			66633409	C9H10O4S	1.47211	-1.44672	0.366853	Down	0.000228729
1.90_194.0784m/z	194.078	1.89625	pos	N-[(3s)-2-Oxotetrahydrofuran-3-Yl]butanamide	N-[(3S)-四氢-2-氧代-3-呋喃基]丁酰胺	HMDB0247190	36732		443433	C8H13NO3	1.47077	1.28797	2.44184	Up	6.56876e-06
14.14_70.0656m/z	70.0656	14.1371	pos	Butyramide	丁酰胺	HMDB0033870	89581	LMFA08010018	10927	C4H9NO	1.47004	-1.2043	0.433979	Down	1.56414e-06
6.65_436.2100n	417.192	6.64503	neg	TEMANOGREL		HMDB0258797				C24H28N4O4	1.47003	1.67315	3.1891	Up	0.00316996
9.56_583.2540m/z	583.254	9.56385	pos	(3Z)-phytochromobilin		HMDB0303975				C33H34N4O6-2	1.46889	-1.15916	0.447773	Down	1.22066e-06
3.59_332.1255m/z	332.125	3.58858	neg	Gly-Phe-Glu	甘氨酰-苯丙氨酰-谷氨酸		18541		102576399	C16H21N3O6	1.46295	1.25366	2.38445	Up	8.81486e-06
6.59_213.0152m/z	213.015	6.59422	neg	1,2-Dinitrobenzene	1,2-二硝基苯	HMDB0244084	70273		10707	C6H4N2O4	1.45832	1.209	2.31178	Up	3.54192e-06
9.42_329.1696n	657.332	9.42027	neg	Hydroxyethylpromethazine	羟乙基异丙嗪	HMDB0240229				C19H25N2OS+	1.45632	1.17702	2.26109	Up	3.70861e-06
10.85_419.1532m/z	419.153	10.8494	neg	C1=CC=CC2=CC3=C(O)C(N)=CC=C3N=C21		HMDB0258097			136174278	C13H10N2O	1.4563	1.50347	2.83525	Up	0.000388426
5.17_218.2112m/z	218.211	5.16692	pos	8-methyl-undecanoic acid			4460	LMFA01020058	5282637	C12H24O2	1.45485	-1.04154	0.485807	Down	1.09248e-08
6.49_352.0863m/z	352.086	6.48688	neg	Triaminophenyl phosphate		HMDB0259149				C18H18N3O4P	1.45203	-1.57237	0.336255	Down	0.00279202
5.35_154.0416m/z	154.042	5.35133	pos	1-naphthoate		HMDB0304016			5049265	C11H7O2-	1.45051	-1.03194	0.489054	Down	2.20589e-09
9.42_362.1563m/z	362.156	9.42027	neg	sinefungin		HMDB0258302			4065234	C15H23N7O5	1.45025	1.20122	2.29935	Up	9.80313e-06
10.51_512.3508m/z	512.351	10.506	pos	3beta-Acetoxy-12-oxo-28,13beta-oleananolide		HMDB0034646	90108		76033272	C32H48O5	1.44894	-1.60511	0.32871	Down	0.00305759
4.02_153.0545m/z	153.054	4.01855	pos	(R)-mandelic Acid	(R)-扁桃酸	HMDB0062635	5671		11914	C8H8O3	1.44681	-1.05704	0.480617	Down	6.30683e-08
9.25_540.3653m/z	540.365	9.25268	pos	MGTS(18:0/0:0)				LMGL06010004		C28H55NO6	1.44677	-1.15179	0.450065	Down	5.69506e-06
15.35_164.1180m/z	164.118	15.3525	pos	5,6-Dimethylbenzimidazole	二甲基苯并咪唑	HMDB0003701	4161		675	C9H10N2	1.4454	-1.07738	0.473888	Down	1.09159e-07
5.61_383.1537m/z	383.154	5.61237	neg	10-Hydroxy-2-oxabicyclo[6.2.2]dodeca-1(10),8,11-trien-3-one	10-羟基-2-氧杂双环[6.2.2]十二-1(10),8,11-三烯-3-酮	HMDB0255348			53867391	C11H12O3	1.44463	-2.0092	0.248411	Down	0.0108065
0.76_246.0903m/z	246.09	0.757717	pos	Methionyl-Asparagine	蛋氨酰天冬酰胺	HMDB0028968	23857		333467	C9H17N3O4S	1.44415	1.71202	3.27619	Up	0.00586124
0.74_292.0723m/z	292.072	0.740917	neg	Etamicastat		HMDB0251986			9819685	C14H15F2N3OS	1.44354	1.54845	2.92502	Up	0.000534574
1.54_283.1036m/z	283.104	1.53563	neg	(x)-1,2-Propanediol 1-O-b-D-glucopyranoside	(x)-1,2-丙二醇1-ObD-吡喃葡萄糖苷	HMDB0033065	88957		21225084	C9H18O7	1.44224	1.61088	3.05437	Up	0.000751952
9.52_335.2228m/z	335.223	9.5176	neg	11,12,15-TriHETRE	11,12,15-三氢键	HMDB0010170	61544	LMFA03050023	53480356	C20H34O5	1.44161	1.23216	2.34919	Up	1.77607e-05
6.02_312.2164m/z	312.216	6.0187	pos	(5,7)-Decadienoylcarnitine	(5,7)-癸二烯酰肉碱	HMDB0241105				C17H29NO4	1.44034	-1.10121	0.466125	Down	9.92241e-07
4.22_246.0383m/z	246.038	4.21538	neg	m-Trifluoromethylhippuric acid	间三氟甲基马尿酸		2682		2777432	C10H8F3NO3	1.44033	-1.38542	0.382779	Down	0.000257885
6.82_349.1675m/z	349.167	6.81518	neg	15-hydroxydeltoidin A	15-羟基三角菌素A			LMPR0103090038		C19H26O6	1.43578	-1.92755	0.262875	Down	0.011958
12.15_353.2698m/z	353.27	12.1511	neg	MG(18:2/0:0/0:0)[rac]	甘油亚油酸酯	HMDB0242115	4252	LMGL01010006	5283469	C21H38O4	1.43529	-1.56858	0.33714	Down	0.00120578
4.52_243.1349m/z	243.135	4.51708	neg	(-)-Slaframine		HMDB0243523			9794202	C10H18N2O2	1.43267	1.52195	2.87179	Up	0.000703737
5.56_439.1610m/z	439.161	5.56328	neg	Gibberellin A43	赤霉素 A43	HMDB0035046			25243967	C20H26O8	1.42953	-1.51063	0.350958	Down	0.00160847
5.93_733.4604n	734.468	5.92643	pos	Erythromycin	红霉素	HMDB0014344	2573	LMPK04000006	12560	C37H67NO13	1.42588	1.93364	3.82018	Up	0.0124447
3.90_405.1728m/z	405.173	3.9025	pos	1,2,10-Trihydroxydihydro-trans-linalyl oxide 7-O-beta-D-glucopyranoside	1,2,10-三羟基二氢-反式-芳樟基氧化物7-O-β-D-吡喃葡萄糖苷	HMDB0033237	89104		85225480	C16H30O10	1.42521	1.2667	2.4061	Up	1.03062e-05
8.43_386.2460n	385.239	8.4254	neg	bufalin	蟾蜍灵	HMDB0249428			2464	C24H34O4	1.42454	-1.46862	0.361329	Down	0.00211412
4.59_276.1261m/z	276.126	4.58713	pos	Sudan II	苏丹红 II	HMDB0258558	73205		18386	C18H16N2O	1.42453	1.0095	2.01321	Up	9.42592e-09
2.75_471.1982m/z	471.198	2.74515	pos	17alpha-estradiol 3-glucosiduronic acid		HMDB0010349	57944	LMST05010026	11988264	C24H32O8	1.42355	1.4549	2.74138	Up	0.000196374
3.94_349.0884m/z	349.088	3.9395	neg	N-Formyl-L-glutamic acid	甲酰基谷氨酸	HMDB0003470	63245		439376	C6H9NO5	1.42046	1.20802	2.3102	Up	2.29006e-05
4.20_470.2359n	493.225	4.19848	pos	(R)-1-O-[b-D-Glucopyranosyl-(1->6)-b-D-glucopyranoside]-1,3-octanediol	(R)-1-O-[bD-吡喃葡萄糖基-(1->6)-bD-吡喃葡萄糖苷]-1,3-辛二醇	HMDB0032799	88721		131751313	C20H38O12	1.41943	1.0853	2.12182	Up	2.77819e-07
11.97_936.6085m/z	936.609	11.9735	pos	PS(22:1/22:2)	磷脂酰丝氨酸(22:1/22:2)	HMDB0112756			131819925	C50H92NO10P	1.41822	1.02131	2.02976	Up	2.35506e-08
13.01_862.5689n	843.551	13.0146	neg	PA(22:6-2OH(10S,17)/24:1)	磷脂酸(22:6-2OH(10S,17)/24:1)	HMDB0266466				C49H83O10P	1.41756	-1.12537	0.458385	Down	4.13568e-06
4.50_312.9944m/z	312.994	4.49872	neg	Glucocapparin	葡萄糖肝素	HMDB0304680				C8H14NO9S2-	1.4171	1.10395	2.14942	Up	5.28516e-07
9.60_415.3201m/z	415.32	9.60493	pos	(23S,25R)-23,25,26-trihydroxyvitamin D3 / (23S,25R)-23,25,26-trihydroxycholecalciferol	(23S,25R)-23,25,26-三羟基维生素D3		42234	LMST03020299	5283761	C27H44O4	1.41661	-1.4304	0.371027	Down	0.000375878
0.74_219.1701m/z	219.17	0.736233	pos	N-Acetylaminooctanoic acid		HMDB0059745			95555	C10H19NO3	1.41558	-1.28332	0.41085	Down	0.000258186
4.22_178.0505m/z	178.05	4.21538	neg	Hippuric acid	马尿酸	HMDB0000714	1301		464	C9H9NO3	1.41497	-1.3754	0.385445	Down	0.000390612
3.96_218.9967m/z	218.997	3.96007	neg	O-Phenolsulfonic acid	2-羟基苯磺酸	HMDB0304953			11867	C6H6O4S	1.40867	-1.83207	0.280862	Down	0.0100265
6.84_237.1132m/z	237.113	6.8434	neg	11,12,13-Trinor-1(10)-spirovetivene-2,7-dione		HMDB0036734	91762		591228	C12H16O2	1.40865	-1.29419	0.407765	Down	0.000264533
12.34_425.2137m/z	425.214	12.3446	pos	Dibutyryl adenosine		HMDB0251178				C18H25N5O6	1.4036	-1.02566	0.491187	Down	8.25979e-08
7.13_681.3474m/z	681.347	7.13142	neg	Physagulin D	藻球蛋白D			LMST01160046	14825632	C34H52O11	1.40252	1.25984	2.39469	Up	0.000184155
4.59_618.3690m/z	618.369	4.58713	pos	4-[3-[3-[Bis[4-(2-methylpropyl)phenyl]methylamino]benzoyl]indol-1-yl]butanoic acid		HMDB0252276	437294		178077	C40H44N2O3	1.4023	1.15485	2.22661	Up	2.45922e-06
4.55_818.4773m/z	818.477	4.54702	pos	PS(TXB2/15:0)	磷脂酰丝氨酸(TXB2/15:0)	HMDB0281045				C41H74NO14P	1.40037	-1.01028	0.496449	Down	8.66707e-08
10.29_577.3749m/z	577.375	10.2868	neg	5beta,6beta-Epoxygorgostan-3beta,7alpha,11alpha,12beta-tetrol 11-acetate	5β,6β-环氧高良姜-3β,7α,11α,12β-四醇-11-醋酸酯			LMST01060018		C32H52O6	1.39596	1.31981	2.49633	Up	0.000137033
4.18_203.1541m/z	203.154	4.17788	pos	(2S,3S)-2-Amino-N-benzyl-3-methylpentanamide	(2S,3S)-2-氨基-N-苄基-3-甲基戊酰胺	HMDB0244500			17763396	C13H20N2O	1.39355	-1.0845	0.471556	Down	3.51175e-06
9.02_584.3341m/z	584.334	9.01598	pos	Penitrem B	青霉B	HMDB0256239			73153936	C37H45NO5	1.38799	1.55727	2.94296	Up	0.00389943
1.15_174.1237m/z	174.124	1.15147	pos	(2-Ethylcrotonoyl)urea	N-(氨基羰基)-2-乙基-2-丁酰胺	HMDB0242468			7214	C7H12N2O2	1.38484	-1.32381	0.39948	Down	8.51574e-05
5.14_453.0865m/z	453.086	5.13737	neg	N-ethyl-7H-purine-6-sulfonamide		HMDB0255132			4043781	C7H9N5O2S	1.38276	-1.64183	0.32045	Down	0.00417169
5.23_293.1467m/z	293.147	5.2285	pos	N-gamma-Glutamylglutamine		HMDB0029147			21122973	C10H17N3O6	1.38074	-1.33693	0.395863	Down	0.000745937
11.98_345.2047m/z	345.205	11.9809	neg	Dehydroabietic acid	脱氢松香酸	HMDB0061925	41263	LMPR0104050005	94391	C20H28O2	1.38016	-1.19554	0.436623	Down	6.9901e-05
14.24_578.3805m/z	578.38	14.239	pos	PC(18:0/3:1)	磷脂酰胆碱(18:0/3:1)		39571	LMGP01010830	24778885	C29H56NO8P	1.37968	-1.64367	0.320042	Down	0.0056194
10.20_291.1585m/z	291.158	10.2013	pos	Tulipinolide	郁金香内酯	HMDB0303566			5322173	C17H22O4	1.3744	1.23059	2.34662	Up	3.92948e-05
5.61_311.0208m/z	311.021	5.61237	neg	2,3-Di-O-methylellagic acid	2,3-二-O-甲基鞣酸	HMDB0041395	95796		5316858	C16H10O8	1.37106	-1.53657	0.344705	Down	0.00223729
14.40_457.3453m/z	457.345	14.4031	pos	Citranaxanthin	柑橘皮类胡萝卜素(合成品)	HMDB0036883			131752078	C33H44O	1.36883	-1.71331	0.304959	Down	0.0146785
9.41_459.2723m/z	459.272	9.40688	neg	Hydrocortisone caproate	氢化可的松杂质39		41882	LMST02030129	107423	C27H40O6	1.36712	-1.59968	0.329949	Down	0.0123115
11.47_337.2385m/z	337.239	11.4749	neg	15-Hydroperoxyeicosa-8Z,11Z,13E-trienoate	15-氢过氧二十碳烷-8Z,11Z,13E-三烯酸酯	HMDB0060106			131769824	C20H34O4	1.36634	-1.33068	0.397582	Down	0.000914142
5.82_377.0704m/z	377.07	5.82437	neg	Enterolactone 3'-sulfate	3'-硫酸肠内酯	HMDB0240505				C18H18O7S	1.3634	-1.4828	0.357793	Down	0.00211225
9.34_430.2965m/z	430.296	9.33548	neg	Deoxycholic acid glycine conjugate	甘氨脱氧胆酸	HMDB0000631	5604		22833539	C26H43NO5	1.35772	-1.18646	0.439381	Down	0.000159574
14.53_401.3406m/z	401.341	14.5265	pos	7-Ketocholesterol	7-酮基胆固醇	HMDB00501	3901	LMST01010049	91474	C27H44O2	1.35518	-1.09013	0.469718	Down	6.4415e-05
5.58_229.0174m/z	229.017	5.57872	neg	4-Allylpyrocatechol sulfate	4-烯丙基邻苯二酚硫酸盐	HMDB0304934			155342006	C9H10O5S	1.35384	-1.73404	0.300608	Down	0.0204773
4.22_447.1834m/z	447.183	4.21905	pos	Lys-Asp-Tyr	赖氨酰-天冬氨酰-酪氨酸	HMDB0304806	22899		24889972	C19H28N4O7	1.35377	1.16502	2.24236	Up	3.59789e-05
4.26_258.1697m/z	258.17	4.26005	pos	Serratamic acid	山梨醇酰胺酸		45741	LMFA00000002	42607281	C13H25NO5	1.35186	-1.17177	0.443877	Down	0.000130953
3.72_308.9665m/z	308.967	3.72225	neg	thienothiazine		HMDB0258990			21911049	C6H5NS2	1.35175	-1.30611	0.40441	Down	0.00257397
0.75_251.0998m/z	251.1	0.753783	pos	Muramic acid	胞壁酸	HMDB0003254	3381		22833605	C9H17NO7	1.34975	-1.11437	0.461891	Down	4.8085e-05
6.90_295.1316m/z	295.132	6.89502	neg	2,3-Didehydrogibberellin A9	2,3-二脱氢赤霉素A9			LMPR0104170023	443459	C19H22O4	1.34797	-1.31451	0.402061	Down	0.00201482
7.69_279.0405m/z	279.041	7.68787	neg	TRIMETHYL PHOSPHATE	磷酸三甲酯	HMDB0259237				C3H9O4P	1.34557	1.14719	2.21482	Up	4.41147e-05
7.45_314.1036m/z	314.104	7.45293	neg	1,2-Disehydronorcoclaurine	1,2-二氢去甲乌云碱	HMDB0302245			622629	C16H15NO3	1.3406	-1.51501	0.349894	Down	0.00613643
3.73_246.0419m/z	246.042	3.73387	neg	Nitecapone	硝替卡朋	HMDB0041949	96190		5464105	C12H11NO6	1.34045	-1.61102	0.327367	Down	0.0124277
14.38_126.1025m/z	126.102	14.3834	pos	p-Phenylenediamine	对苯二胺	HMDB0256055	73191		7814	C6H8N2	1.34018	-1.20486	0.43381	Down	0.000137598
6.72_615.2441m/z	615.244	6.71533	pos	chrysoeriol 7-O-neohesperidoside	柯伊利素7-O-新橙皮甙	HMDB0304575			353908	C32H38O12	1.33931	-1.10934	0.463506	Down	9.07407e-05
11.89_318.2764n	341.266	11.8909	pos	1-O-(2R-hydroxy-pentadecyl)-sn-glycerol				LMGL01020062	137323863	C18H38O4	1.33606	-1.15807	0.448113	Down	4.12869e-05
4.22_399.0786m/z	399.079	4.21538	neg	Glucose lactate pyruvate	葡萄糖乳酸丙酮酸	HMDB0252783				C12H18O12	1.33556	-1.45874	0.36381	Down	0.0063489
8.47_369.1743m/z	369.174	8.47227	neg	5alpha-androstane-3alpha-ol-17-one sulfate	5α-雄甾烷-3α-醇-17-酮硫酸盐	HMDB0002759	3559	LMST05020001	159663	C19H30O5S	1.33252	-1.48636	0.356911	Down	0.00533115
5.56_243.0331m/z	243.033	5.56328	neg	4-phenylbutanic acid-O-sulphate	4-苯基丁酸-O-硫酸盐	HMDB0059983			124202078	C10H12O5S	1.33083	-1.41363	0.375367	Down	0.00221871
3.72_257.9690m/z	257.969	3.72225	neg	1-hydroxy-2-methyl-2-(E)-butenyl 4-diphosphate		HMDB0304014				C5H9O8P2-3	1.32766	-1.30537	0.404617	Down	0.00400415
13.18_950.0968m/z	950.097	13.1834	pos	3-hydroxy-3-phenylpropionyl-CoA		HMDB0304130			70680322	C30H40N7O18P3S-4	1.32755	1.55863	2.94573	Up	0.00322283
5.45_244.0410m/z	244.041	5.44932	neg	3'-thiacytidine		HMDB0246108				C8H11N3O4S	1.32749	-1.55197	0.341043	Down	0.00908265
7.69_388.1921n	369.174	7.68787	neg	10-Methyl-9-(10-methyl-1H-acridin-9-yl)-1H-acridine		HMDB0257936			18175976	C28H24N2	1.32618	-1.63539	0.321883	Down	0.012875
12.08_859.5238n	842.521	12.0778	pos	PS(18:1/PGD1)	磷脂酰丝氨酸(18:1/PGD1)	HMDB0281620				C44H78NO13P	1.32552	1.48406	2.79735	Up	0.00213728
5.34_527.2866m/z	527.287	5.33863	neg	Vorinostat	伏立诺他	HMDB0015568	45206		5311	C14H20N2O3	1.3232	-1.42179	0.373248	Down	0.00546333
11.80_369.2435m/z	369.244	11.7953	neg	Cavipetin C	卡维佩汀C	HMDB0030366	86918		14527070	C24H36O4	1.31749	1.35554	2.55893	Up	0.00131217
5.20_466.1673m/z	466.167	5.20183	neg	Pitavastatin	匹伐他汀	HMDB0041991	96199		5282452	C25H24FNO4	1.3144	-1.26898	0.414952	Down	0.00121126
4.19_407.0468m/z	407.047	4.19493	neg	2-O-Galloylgalactaric acid		HMDB0036932	91921		75060826	C13H14O12	1.31395	1.19276	2.2859	Up	0.000296044
12.91_203.0906n	405.174	12.9097	neg	Alanylasparagine	NΑ-DL-丙氨酰基-DL-天冬酰胺酸	HMDB0028682	23728		1549440	C7H13N3O4	1.30972	-1.16038	0.447396	Down	0.000336984
3.94_213.0170m/z	213.017	3.9395	neg	1-Deoxy-D-xylulose 5-phosphate	1-脱氧-D-葡萄糖-5-磷酸酯	HMDB0001213	6085		443201	C5H11O7P	1.30468	1.03108	2.04356	Up	2.1879e-05
0.91_164.9296m/z	164.93	0.906	pos	Sodium phosphate (Na3PO4)	磷酸三钠	HMDB0303418			24243	Na3O4P	1.30317	-1.15667	0.448545	Down	0.000606213
3.98_174.0548m/z	174.055	3.97758	pos	Quinaldic acid	喹哪啶酸	HMDB0000842	5805		7124	C10H7NO2	1.29875	-1.01753	0.493963	Down	1.96531e-05
4.20_317.2069m/z	317.207	4.19848	pos	(4Z,6Z)-3-Hydroxyocta-4,6-dienoylcarnitine		HMDB0241727				C15H25NO5	1.29857	1.10912	2.15714	Up	4.97938e-05
5.75_385.1697m/z	385.17	5.74938	neg	Olamufloxacin		HMDB0255928			22633931	C20H23FN4O3	1.29372	-1.53135	0.345953	Down	0.0134173
7.57_367.1353m/z	367.135	7.57188	neg	N6-Galacturonyl-L-lysine	N6-半乳糖醛酰-L-赖氨酸	HMDB0033106	88997		131751374	C12H22N2O8	1.29207	-1.46694	0.36175	Down	0.006043
4.63_244.9656m/z	244.966	4.63452	neg	Perfluorovaleric acid	九氟戊酸	HMDB0256331	346583		75921	C5HF9O2	1.29137	-1.65721	0.317052	Down	0.0201937
10.87_321.2342m/z	321.234	10.8674	neg	1-Phenylpiperidine	N-苯基哌啶	HMDB0243994	349111		20038	C11H15N	1.29116	1.39454	2.62905	Up	0.00363879
10.79_343.2278m/z	343.228	10.7877	neg	8-HDoHE		HMDB0060051			131769810	C22H32O3	1.28391	1.07656	2.10899	Up	0.000361495
14.36_85.0763m/z	85.0763	14.3629	pos	1,4-Diamino-2-butyne		HMDB0244206				C4H8N2	1.28338	-1.08169	0.472475	Down	7.1278e-05
4.22_321.0625m/z	321.062	4.21538	neg	Aesculin	秦皮甲素	HMDB0030820	43929		5281417	C15H16O9	1.28305	-1.38759	0.382202	Down	0.00995548
13.29_604.4177n	622.452	13.2874	pos	Polyoxyethylene sorbitan monooleate		HMDB0256687			443315	C32H60O10	1.27744	1.25259	2.38268	Up	0.000641943
5.61_519.1286m/z	519.129	5.61237	neg	Khellin	凯林	HMDB0253797	41035	LMPK13110001	3828	C14H12O5	1.27716	-1.61689	0.326036	Down	0.0145783
9.89_560.2814m/z	560.281	9.89278	pos	PI(14:1/0:0)	磷脂酰肌醇(14:1/0:0)			LMGP06050031	52928626	C23H43O12P	1.27546	-1.07772	0.473775	Down	0.000318021
2.42_219.1335m/z	219.134	2.42057	pos	Ser-Leu	丝氨酰-亮氨酸	HMDB0258242				C9H18N2O4	1.27514	1.38016	2.60297	Up	0.00227222
4.61_465.2308m/z	465.231	4.60775	pos	glas#3	1-o-(8r-(3,6-二脱氧-α-l-阿拉伯-吡喃己糖基氧基)-2e-壬烯酰基)-β-d-吡喃葡萄糖			LMFA13040105	86289875	C21H36O11	1.271	1.08385	2.11968	Up	0.000109863
3.71_172.9909m/z	172.991	3.71425	neg	Phenol sulphate	苯酚硫酸盐	HMDB0060015			74426	C6H6O4S	1.27035	-1.21169	0.431762	Down	0.00463478
7.69_493.0319m/z	493.032	7.68787	neg	PU-H71	6-氨基-8-[(6-碘-1,3-苯并二茂-5-基)硫基]-N-异丙基-9H-嘌呤-9-丙胺		96497		9549213	C18H21IN6O2S	1.2657	1.07068	2.10042	Up	8.86814e-05
11.50_375.1271m/z	375.127	11.4959	neg	Ethinyl estradiol sulfate		HMDB0252017			53461774	C20H24O5S	1.26563	-1.16945	0.44459	Down	0.000591325
13.54_844.5561m/z	844.556	13.5389	neg	11-((2-Dimethylaminoethyl)oxymethyl)erythromycin A 9-methoxime		HMDB0251898			84017	C43H81N3O14	1.26562	-1.46248	0.362868	Down	0.0143894
7.28_360.2740m/z	360.274	7.28428	pos	3-hydroxydodecanoylcarnitine	3-羟基十二烷酰肉碱	HMDB0061638		LMFA07070039	71464535	C19H37NO5	1.26456	-1.01974	0.493206	Down	0.000174915
11.62_634.3720m/z	634.372	11.6243	neg	OG-PC				LMGP20010027	134812299	C31H58NO10P	1.26044	1.24	2.36199	Up	0.00250411
5.01_259.0099m/z	259.01	5.00603	neg	4-Hydroxy-5-methyl-3(2H)-thiophenone		HMDB0033548	89358		22752005	C5H6O2S	1.25914	-1.31037	0.403218	Down	0.00264971
3.32_188.9859m/z	188.986	3.32442	neg	2,5-Dihydroxybenzenesulfonic Acid	羟苯磺酸	HMDB0245498			17507	C6H6O5S	1.25625	-1.28801	0.409516	Down	0.00460719
4.49_203.0016m/z	203.002	4.49243	neg	4-Methylcatechol 1-sulfate	1，2-苯二醇-4-甲基-1-硫酸氢盐	HMDB0240459			54104170	C7H8O5S	1.25567	-1.56284	0.338484	Down	0.0320782
5.79_310.2007m/z	310.201	5.79138	pos	(3Z,5E,7E)-Decatrienoylcarnitine	(3Z,5E,7E)-十碳三烯酰肉碱	HMDB0241124				C17H27NO4	1.25513	-1.03068	0.489478	Down	0.000309944
4.73_348.2029m/z	348.203	4.73043	neg	5-Hydroxy-2-propylpentanoylcarnitine	5-羟基-2-丙基戊酰肉碱	HMDB0241899				C15H29NO5	1.2544	-1.05867	0.480074	Down	0.000423251
7.96_336.1597m/z	336.16	7.95993	neg	RCS-4 N-(4-hydroxypentyl) metabolite			96591		89973121	C21H23NO3	1.25142	1.31039	2.48009	Up	0.00600766
4.22_331.0912m/z	331.091	4.21538	neg	3-Methylxanthine	3-甲基黄嘌呤	HMDB0001886	2820		70639	C6H6N4O2	1.24918	-1.19544	0.436652	Down	0.00379259
9.26_293.1396m/z	293.14	9.2575	neg	Atractylenolide III	苍术内酯III.	HMDB0248708			196319	C15H20O3	1.24604	1.02475	2.03461	Up	0.00010752
5.29_600.2853m/z	600.285	5.28977	neg	DG(2:0/LTE4/0:0)	甘油二酯(2:0/LTE4/0:0)	HMDB0296923				C28H45NO8S	1.24449	-1.56201	0.338679	Down	0.00981843
4.50_332.2175m/z	332.218	4.50352	pos	Ser-Leu-Ile	丝氨酰-亮氨酰-异亮氨酸		18955		145457799	C15H29N3O5	1.23855	1.13876	2.20192	Up	0.000654129
0.72_211.0012m/z	211.001	0.72045	neg	Ribose 1-phosphate	1-磷酸核糖	HMDB0001489	3370		439236	C5H11O8P	1.2363	1.06221	2.08812	Up	0.000201188
6.42_626.3551m/z	626.355	6.42268	neg	ROSAMICIN		HMDB0257306			5096	C31H51NO9	1.23001	1.58784	3.006	Up	0.0314352
4.67_300.9722m/z	300.972	4.6692	pos	Demeton-S-methylsulphon	茅草枯		72738		28213	C6H15O5PS2	1.22758	-1.39515	0.380205	Down	0.0116021
9.83_283.1306m/z	283.131	9.83003	pos	10-Hydroxy-3-methoxy-1,3,5,7-cadinatetraen-9-one	10-羟基-3-甲氧基-1,3,5,7-卡迪四烯-9-酮	HMDB0036456			3504625	C16H20O3	1.22749	-1.13319	0.455905	Down	0.000793649
12.17_313.2748m/z	313.275	12.1701	neg	Stearaldehyde	硬脂醛	HMDB0002384	6658	LMFA06000098	12533	C18H36O	1.22549	-1.13477	0.455407	Down	0.00166785
5.38_201.0223m/z	201.022	5.37785	neg	3-ethylphenyl Sulfate	3-乙基苯基硫酸盐	HMDB0062721			86290012	C8H10O4S	1.22478	-1.71919	0.303719	Down	0.036041
8.47_721.2109m/z	721.211	8.47227	neg	5-Hydroxyomeprazole	5-羟基奥美拉唑	HMDB0014010	1636		119560	C17H19N3O4S	1.22465	1.36511	2.57597	Up	0.00396109
1.59_297.0568m/z	297.057	1.5871	neg	threo-hydroxyaspartic acid		HMDB0259046			10313218	C4H7NO5	1.21756	1.32374	2.50314	Up	0.00329677
6.77_484.2926m/z	484.293	6.77222	pos	5-alpha-Dihydrotestosterone glucuronide	5-α-二氢睾酮葡萄糖苷酸	HMDB0006203	57959	LMST05010041	44263365	C25H38O8	1.21686	-1.15147	0.450167	Down	0.00314436
5.15_221.0089m/z	221.009	5.15103	neg	Aminomethylphosphonic acid	氨甲基膦酸	HMDB0240707	68788		14017	CH6NO3P	1.21579	1.29303	2.45042	Up	0.00549249
8.26_255.1602m/z	255.16	8.2582	neg	(6R,8Z)-6-Hydroxy-3-oxotetradecenoic acid	(6R,8Z)-6-羟基-3-氧代十四烯酸	HMDB0062363			134819281	C14H24O4	1.21513	-1.05926	0.479878	Down	0.0011582
1.42_289.1502m/z	289.15	1.42213	pos	Gly-Asn-Val	甘氨酰-天冬酰胺酰-缬氨酸		18929		145455586	C11H20N4O5	1.20244	-1.12395	0.458836	Down	0.00148725
4.26_114.1278m/z	114.128	4.26005	pos	Cyclohexanemethylamine	环己甲胺	HMDB0250653			76688	C7H15N	1.20239	-1.09404	0.468449	Down	0.000698826
9.91_457.2339m/z	457.234	9.91285	pos	LysoPA(18:2/0:0)	溶血磷脂酸(18:2/0:0)	HMDB0007856			20835023	C21H39O7P	1.20143	1.04058	2.05705	Up	0.000815912
4.52_244.1420n	245.149	4.5241	pos	Isoleucylhydroxyproline		HMDB0028908			61158802	C11H20N2O4	1.19949	1.32356	2.50282	Up	0.00839375
4.63_188.0139n	187.007	4.63452	neg	o-Cresol sulfate	甲酚磺酸	HMDB0240655				C7H8O4S	1.19946	-1.47627	0.359416	Down	0.0241286
7.97_366.2634m/z	366.263	7.969	pos	6-Hydroxytrtradeca-9,12-dienoylcarnitine	6-羟基十四碳-9,12-二烯酰基肉碱	HMDB0241387				C21H37NO5	1.19663	-1.08212	0.472335	Down	0.00262324
10.87_320.2350n	319.228	10.8674	neg	18-hydroxy-arachidonic acid	18-羟基花生四烯酸	HMDB0006245	45979	LMFA03060093	11141754	C20H32O3	1.19621	1.01593	2.02221	Up	0.000539465
9.13_291.0663m/z	291.066	9.12673	neg	Coumarin	香豆素	HMDB0001218	3525		323	C9H6O2	1.19621	1.25176	2.38131	Up	0.00877068
15.19_505.4268m/z	505.427	15.1871	neg	5-n-pentacosylresorcinol	5-二十五烷基间苯二酚	HMDB0038485	93164	LMPK15030007	155463	C31H56O2	1.19571	1.11785	2.17023	Up	0.00183164
6.98_316.2478m/z	316.248	6.98415	pos	5-Methylnonanoylcarnitine		HMDB0240787				C17H33NO4	1.19428	-1.26924	0.414879	Down	0.0187806
5.37_269.0103m/z	269.01	5.3662	neg	Nasutin A		HMDB0255467			5909486	C14H6O6	1.19212	-1.71387	0.304841	Down	0.0384619
14.39_489.2779m/z	489.278	14.3857	neg	Bisnortilidin		HMDB0249273			521475	C15H19NO2	1.18702	1.08205	2.11704	Up	0.0010387
0.75_229.1180m/z	229.118	0.753783	pos	Aspartyl-Isoleucine	天冬氨酰异亮氨酸	HMDB0028756			21845165	C10H18N2O5	1.18668	-1.08421	0.47165	Down	0.00184396
3.39_257.1006m/z	257.101	3.38758	neg	5-Hydroxy-2-imino-1-methylimidazolidin-4-one		HMDB0244988			124266	C4H7N3O2	1.1854	1.35775	2.56285	Up	0.00956644
9.20_503.3231m/z	503.323	9.2016	neg	Polysorbate 80		HMDB0303581			86289077	C26H50O10	1.18527	-1.2378	0.42402	Down	0.00439806
5.37_178.0860m/z	178.086	5.37185	pos	3-(2-Hydroperoxyethyl)-1H-indole	3-（2-氢过氧乙基）-1H-吲哚	HMDB0257988			14936877	C10H11NO2	1.18341	-1.17333	0.443397	Down	0.00273649
4.19_281.1007m/z	281.101	4.19493	neg	hydroxymethylcytosine	羟甲基胞嘧啶	HMDB0253278			21989274	C5H7N3O2	1.17972	1.00355	2.00493	Up	0.000419047
12.59_730.5368m/z	730.537	12.5891	pos	PC(16:1/16:1)	磷脂酰胆碱(16:1/16:1)	HMDB0008002	59450	LMGP01010684	24778764	C40H76NO8P	1.1796	-1.04546	0.484491	Down	0.00064452
14.99_479.4110m/z	479.411	14.9928	neg	5,6-methylenetetradecanoic acid				LMFA01140043	85685811	C15H28O2	1.17919	1.04968	2.07007	Up	0.000760395
0.72_160.0966m/z	160.097	0.719367	pos	Medicanine		HMDB0038625	93286		101409750	C7H13NO3	1.1773	-1.36285	0.388813	Down	0.0206774
1.59_232.0553n	213.037	1.5871	neg	(2E,11Z)-5-[5-(Methylthio)-4-penten-2-ynyl]-2-furanacrolein		HMDB0031070	87387		131751128	C13H12O2S	1.17198	1.09428	2.13507	Up	0.00104646
12.19_479.2656m/z	479.266	12.1912	neg	DG(20:4+=O/2:0/0:0)	甘油二酯(20:4+=O/2:0/0:0)	HMDB0296952				C25H38O6	1.16566	-1.10353	0.465375	Down	0.00248953
6.46_429.1954m/z	429.195	6.45897	neg	17beta-Estradiol 3-(beta-D-glucuronide)	17Β-雌二醇3-(Β-D-葡糖苷酸)钠盐	HMDB0006224		LMST05010007	440713	C24H32O8	1.16086	-1.38337	0.383322	Down	0.0269538
14.33_402.1638m/z	402.164	14.33	neg	4-Hydroxytoremifene		HMDB0246469			119169	C26H28ClNO2	1.14966	1.11215	2.16167	Up	0.00377331
9.59_431.3169m/z	431.317	9.5893	neg	7alpha,12alpha,25-Trihydroxycholest-4-en-3-one	7α,12α,25-三羟基胆甾醇-4-en-3-酮		84839	LMST04030105	5284265	C27H44O4	1.14947	-1.13596	0.455033	Down	0.0044502
14.12_359.2957m/z	359.296	14.1207	neg	Homodihydrojasmone		HMDB0031181	87473		11137732	C12H20O	1.14336	1.01776	2.02478	Up	0.00115072
8.02_357.1346m/z	357.135	8.0234	neg	6,7-Dimethyl-2,3-di-2-pyridylquinoxaline	6,7-二甲基-2,3-二(2-吡啶基)喹喔啉	HMDB0247112	357665		81109	C20H16N4	1.14204	1.43629	2.70623	Up	0.0339583
3.39_325.0882m/z	325.088	3.38758	neg	4-Hydroxy-L-glutamic acid	(2S,4R)-4-羟基-L-谷氨酸	HMDB0002273	63472		440854	C5H9NO5	1.13756	1.32571	2.50656	Up	0.013281
4.80_439.1612m/z	439.161	4.80318	neg	p-Hydroxyl-ethotoin	对羟基乙妥英	HMDB0061174	943702		71396710	C11H12N2O3	1.13717	-1.06325	0.478553	Down	0.00291877
7.33_357.2783m/z	357.278	7.33145	pos	3beta-Hydroxy-5-cholenoic acid	5-胆酸-3β-醇	HMDB0000308	5297	LMST04010201	92997	C24H38O3	1.13604	-1.0402	0.48626	Down	0.00480848
10.30_311.2209m/z	311.221	10.3042	pos	9-oxo-12,13-epoxy-10-octadecenoic acid		HMDB0013623	35761	LMFA02000247	5283007	C18H30O4	1.1339	-1.04999	0.482973	Down	0.00323527
7.33_496.2142m/z	496.214	7.32578	neg	Dexamethasone isonicotinate	地塞米松异烟酸酯	HMDB0251081			14475474	C28H32FNO6	1.12887	-1.01323	0.495436	Down	0.00341827
7.33_695.3634m/z	695.363	7.32578	neg	Acrivastine	阿伐斯汀-D7	HMDB0240231			5284514	C22H24N2O2	1.12439	1.17165	2.25269	Up	0.00930935
6.19_550.2461m/z	550.246	6.18785	neg	Endoxifen O-glucuronide	内多昔芬O-葡萄糖苷酸	HMDB0060622			131769920	C31H37NO8	1.12368	1.35167	2.55207	Up	0.0204877
6.16_227.0382m/z	227.038	6.1594	neg	Polyanethole-sulfate	聚茴香脑硫酸盐	HMDB0256670				C10H12O4S	1.12358	-1.16729	0.445256	Down	0.0202989
1.23_321.0438m/z	321.044	1.22828	pos	S-sulfanylglutathione	S-硫酰谷胱甘肽	HMDB0304477				C10H16N3O6S2-	1.12036	1.47236	2.77476	Up	0.0409622
1.60_215.0170m/z	215.017	1.59728	neg	Sodium alginate		HMDB0303715			5102882	C6H9NaO7	1.12028	1.02308	2.03225	Up	0.00125619
13.84_437.3637m/z	437.364	13.8427	neg	4-Methyl-3-heptyl linoleate	4-甲基-3-庚基亚油酸酯		97343	LMFA07010656	56936029	C26H48O2	1.11772	1.24787	2.3749	Up	0.00553081
3.40_237.0050m/z	237.005	3.39745	neg	TRIMELLITIC ANHYDRIDE	偏苯三酸酐	HMDB0259233				C9H4O5	1.11596	1.06977	2.0991	Up	0.00409127
8.42_327.1407m/z	327.141	8.4228	pos	Glucose-6-glutamate	6-谷氨酸葡萄糖	HMDB0252776			71336986	C11H19NO9	1.11567	-1.15466	0.449173	Down	0.0146052
10.79_411.2152m/z	411.215	10.7877	neg	ingenol mebutate	巨大戟二萜醇甲丁酸酯			LMFA07010911	46174141	C25H34O6	1.11331	1.00321	2.00446	Up	0.00498783
4.22_263.1038m/z	263.104	4.21538	neg	Phenylacetylglutamine	苯乙酰谷氨酰胺	HMDB0006344	58397		92258	C13H16N2O4	1.11058	-1.0033	0.498856	Down	0.00663074
11.60_455.2211m/z	455.221	11.6009	neg	1-(5Z,8Z,11Z,14Z,17Z-eicosapentaenoyl)-glycero-3-phosphate	1-(5Z,8Z,11Z,14Z,17Z-二十碳五烯酰基)-甘油-3-磷酸酯	HMDB0062308				C23H37O7P	1.10393	1.03983	2.05598	Up	0.00498132
8.06_611.3441m/z	611.344	8.06057	neg	Venustone	维纳斯石			LMST01010431		C31H50O9	1.10346	1.06274	2.08889	Up	0.00925444
1.60_355.0155m/z	355.016	1.59728	neg	S-2-Propenyl 2-propene-1-sulfonothioate		HMDB0039940	94482		85776791	C6H10O2S2	1.1016	1.17382	2.25609	Up	0.00642479
0.78_381.0303m/z	381.03	0.777767	neg	2,3-dioxo-L-gulonate		HMDB0304040			25202314	C6H7O7-	1.09995	-1.04072	0.486084	Down	0.00416308
6.27_505.2661m/z	505.266	6.26513	neg	Cybutryne	异菌脲-D5		68695		91590	C11H19N5S	1.0989	1.27026	2.41205	Up	0.0293649
4.49_270.9895m/z	270.99	4.49243	neg	Methylarctate B		HMDB0302319				C14H10O3S2	1.09203	-1.09237	0.468989	Down	0.0166104
7.70_409.1669m/z	409.167	7.70157	neg	Deoxycorticosterone sulfate		HMDB0251004			73744588	C21H30O6S	1.08106	1.23578	2.35508	Up	0.0419313
13.21_538.4824m/z	538.482	13.2061	pos	(17Z)-Hexacos-17-enoylcarnitine		HMDB0241641				C33H63NO4	1.08088	1.06947	2.09867	Up	0.00693965
8.99_443.1301m/z	443.13	8.98518	neg	Flavone	黄酮	HMDB0003075	3359	LMPK12110097	10680	C15H10O2	1.07635	1.04653	2.06556	Up	0.00506721
13.21_374.1322m/z	374.132	13.2055	neg	Haloperidol	氟哌啶醇-D4氘代标记	HMDB0014645	3157		3559	C21H23ClFNO2	1.07483	1.06366	2.09022	Up	0.00771792
4.19_339.0591m/z	339.059	4.19493	neg	1,5-Dinitrocyclohexa-1,4-diene		HMDB0255345			91509475	C6H6N2O4	1.07363	1.06131	2.08682	Up	0.00580494
13.58_592.4692n	593.476	13.5765	pos	DG(18:3-OH/a-15:0/0:0)	甘油二酯(18:3-OH/a-15:0/0:0)	HMDB0297656				C36H64O6	1.07327	-1.10556	0.464721	Down	0.0279947
8.55_335.2229m/z	335.223	8.54553	neg	PGD1	前列腺素D1	HMDB0005102	3499	LMFA03010049	5280936	C20H34O5	1.06833	1.03675	2.05159	Up	0.0111144
4.66_589.1243m/z	589.124	4.655	neg	Luteolin 7-glucuronylglucoside	木犀草素7-葡萄糖醛酸苷	HMDB0302597				C27H28O16	1.05919	-1.20449	0.433924	Down	0.0358004
4.66_448.9280m/z	448.928	4.655	neg	Pentafluorophenyl isothiocyanate	五氟苯基硫氰酸酯	HMDB0256266				C7F5NS	1.05268	-1.23902	0.42366	Down	0.041153
14.67_581.2408m/z	581.241	14.6699	neg	Pemptoporphyrin	朊卟啉	HMDB0256216				C32H32N4O4	1.04747	1.24042	2.36267	Up	0.0257596
6.92_430.2947m/z	430.295	6.91973	pos	N-(3beta,7beta,dihydroxycholest-5-en-24-oyl) glycine	N-(3β,7β,二羟基胆甾醇-5-en-24-酰基)甘氨酸			LMST05030017		C26H41NO5	1.04713	1.15701	2.22994	Up	0.021202
13.27_567.2996m/z	567.3	13.2665	neg	Tropicamide	托吡卡胺	HMDB0014947	43367		5593	C17H20N2O2	1.04441	1.16044	2.23526	Up	0.0139703
9.79_585.2700m/z	585.27	9.78905	pos	Lumirubin	胆红素	HMDB0254205			136614764	C33H36N4O6	1.03053	1.30053	2.46319	Up	0.0432718
4.12_318.1908m/z	318.191	4.11593	pos	Octanedioylcarnitine	辛二酰肉碱	HMDB0241733			92036974	C15H27NO6	1.02593	1.13076	2.18974	Up	0.0201919
6.21_385.1693m/z	385.169	6.21222	neg	prednisolone-16alpha-carboxylic acid	泼尼松龙-16α-羧酸			LMST02030226	17756755	C22H28O7	1.02505	-1.16247	0.446747	Down	0.0476339
10.03_551.3957m/z	551.396	10.034	neg	(20R)-24-Hydroxy-19-norgeminivitamin D3	(20R)-24-羟基-19-降维生素D3		42556	LMST03020630	11214329	C31H54O5	1.02171	1.04908	2.06921	Up	0.00661609
1.06_248.1489m/z	248.149	1.05692	pos	3-Hydroxybutyrylcarnitine	3-羟基丁酰肉碱	HMDB0013127				C11H21NO5	1.01768	1.03106	2.04352	Up	0.0235994
13.18_602.4278m/z	602.428	13.1829	neg	Vecuronium	维库溴铵	HMDB0015432			39765	C34H57N2O4+	1.0172	1.18674	2.27637	Up	0.0157518
6.46_229.0538m/z	229.054	6.45897	neg	Thymol Sulfate	硫酸麝香酚	HMDB0062720			12456386	C10H14O4S	1.00839	-1.17817	0.441912	Down	0.0443242
9.03_604.3263m/z	604.326	9.02503	neg	PC(0:0/20:4;O)	磷脂酰胆碱(0:0/20:4;O)			LMGP20010053	129626803	C28H50NO8P	1.00536	1.01808	2.02523	Up	0.0182161
4.96_144.0118m/z	144.012	4.96417	neg	Mercaptopropionylglycine	硫普罗宁	HMDB0250055			165505	C5H9NO3S	1.00223	1.08591	2.12271	Up	0.0239076
0.77_179.0788m/z	179.079	0.77205	pos	beta-D-Galactosamine	2-氨基-2-脱氧-β-D-吡喃半乳糖	HMDB0245095			739	C6H13NO5	1.00056	-1.01442	0.495028	Down	0.0161678
4.13_273.0076m/z	273.008	4.13315	neg	Isoferulic acid 3-sulfate	3-硫酸异阿魏酸	HMDB0041748	96106		71749556	C10H10O7S	0.999407	1.03403	2.04773	Up	0.0141865
14.35_621.3465m/z	621.346	14.3505	neg	Etiopurpurin		HMDB0252104				C37H44N4O2	0.998718	1.34893	2.54724	Up	0.0388147
5.21_194.0962m/z	194.096	5.20868	pos	2-Methoxy-3-methyl-9H-carbazole		HMDB0033456	89287		11052947	C14H13NO	0.996663	-1.02884	0.490105	Down	0.0385693
1.21_280.0174m/z	280.017	1.20765	pos	Endothion	因毒磷	HMDB0251802	72741		17717	C9H13O6PS	0.9957	1.12956	2.18792	Up	0.0355478
7.27_497.2760m/z	497.276	7.2705	neg	DG(20:4-2OH(5S,15S)/0:0/2:0)	甘油二酯(20:4-2OH(5S,15S)/0:0/2:0)	HMDB0297002				C25H40O7	0.983309	-1.01392	0.4952	Down	0.0352148
1.26_291.0895m/z	291.09	1.25583	neg	2-Hydroxyquinoxaline	2-羟基喹喔啉	HMDB0245168	343049		14526	C8H6N2O	0.97885	1.12943	2.18772	Up	0.0431985
1.36_333.0518m/z	333.052	1.358	neg	s-Nitroglutathione		HMDB0257410			54501752	C10H16N4O8S	0.97197	1.02932	2.04107	Up	0.018052
4.63_107.0493m/z	107.049	4.63452	neg	3,5-Dimethyl-1,2-cyclopentanedione	3,5-二甲基-1,2-环戊二酮	HMDB0037027	92009		61634	C7H10O2	0.950934	-1.00537	0.498143	Down	0.0409439
14.59_416.3640m/z	416.364	14.5878	pos	Nb-Palmitoyltryptamine		HMDB0040815	95277		3726592	C26H42N2O	0.923949	-1.03649	0.487512	Down	0.0415804
